1 Running title: Adaptation of *Aquilegia* species

2

3 **Genetic and epigenetic characteristics associated with**  
4 **the rapid radiation of *Aquilegia* species**

5

6 Zhen-Hui Wang<sup>1,#</sup>, Tianyuan Lu<sup>2,3,4,#</sup>, Ming-Rui Li<sup>2</sup>, Ning Ding<sup>2</sup>, Li-Zhen Lan<sup>2</sup>, Xiang Gao<sup>5</sup>, Ai-Sheng Xiong<sup>6,\*</sup>,  
7 Jian Zhang<sup>1,7,\*</sup> and Lin-Feng Li<sup>2,\*</sup>

8

9 <sup>1</sup>Faculty of Agronomy, Jilin Agricultural University, Changchun 130118, China;

10 <sup>2</sup>Ministry of Education Key Laboratory for Biodiversity Science and Ecological Engineering, School of Life  
11 Sciences, Fudan University, Shanghai 200438, China;

12 <sup>3</sup>McGill University and Genome Quebec Innovation Center, Montreal H3A 0G1, Quebec, Canada;

13 <sup>4</sup>Lady Davis Institute, SMBD JGH, Montreal H3A 1A3, Quebec, Canada;

14 <sup>5</sup>Key Laboratory of Molecular Epigenetics of the Ministry of Education, Northeast Normal University,  
15 Changchun 130024, China.

16 <sup>6</sup>State Key Laboratory of Crop Genetics and Germplasm Enhancement, Ministry of Agriculture and Rural  
17 affairs, Key Laboratory of Biology and Germplasm Enhancement of Horticultural Crops in East China,  
18 College of Horticulture, Nanjing Agricultural University, 1 Weigang, 210095 Nanjing, China

19 <sup>7</sup>Department of Biology, University of British Columbia, Okanagan, Kelowna, Canada

20 **\*Correspondence author:**

21 **Lin-Feng Li** ([lilinfeng@fudan.edu.cn](mailto:lilinfeng@fudan.edu.cn))

22 **Jian Zhang** ([zhangjian@jlau.edu.cn](mailto:zhangjian@jlau.edu.cn))

23 **Ai-Sheng Xiong** ([xiongaisheng@njau.edu.cn](mailto:xiongaisheng@njau.edu.cn))

24

25 **Abstract**

26 Elucidating the genetic and epigenetic bases underlying species diversification is crucial to  
27 understanding the evolution and persistence of biodiversity. As a well-known horticultural plant grown  
28 worldwide, the genus *Aquilegia* (columbine) is also a model system in adaptive radiation research. In this  
29 study, we surveyed the genomes and DNA methylomes of ten representative *Aquilegia* species from the  
30 Asian, European and North American lineages. Our inferences of the phylogenies and population  
31 structure revealed clearly high genetic and DNA methylomic divergence across the three lineages. By  
32 multi-levelled genome-wide scanning, we identified candidate genes exhibiting lineage-specific genetic  
33 or epigenetic variation patterns that are signatures of inter-specific divergence. We demonstrated that  
34 these species diversification-associated genetic variations and epigenetic variabilities were partially  
35 independent but were both functionally related to various biological processes vital to adaptation,  
36 including stress tolerance, cell reproduction and DNA repair. Our study provides an exploratory  
37 overview of how the established genetic and epigenetic signatures are associated with the rapid  
38 radiation of *Aquilegia* species.

39 **Key words:** Adaptive radiation; *Aquilegia*; Selection; Whole-genome sequencing; DNA methylation

40

## 41 **Introduction**

42 Adaptive radiation is the rapid diversification of a single ancestral species into a vast array of common  
43 descendants that inhabit different ecological niches or use a variety of resources, but differ in  
44 phenotypic traits required to exploit diverse environments<sup>1-4</sup>. Disentangling the evolutionary  
45 mechanisms underpinning adaptive radiation is fundamental to understanding the evolution and  
46 persistence of biodiversity<sup>5,6</sup>. This has been a key focus of many studies which were investigating  
47 different animal and plant lineages that diversified through adaptive radiation, including Hawaiian  
48 silversword, Caribbean anoles, Darwin's finches, and African cichlids<sup>7-10</sup>. However, it remains under-  
49 investigated as to why some lineages could diversify rapidly but their close relatives or other  
50 sympatrically distributed lineages did not. In the past decades, accumulating evidence from diverse  
51 radiation lineages suggest that both the extrinsic environmental factors (e.g., resource availability) and  
52 genetic variations can determine the rate and volume of species diversification<sup>11</sup>. Among the  
53 environmental triggers, ecological opportunity is considered as the primary mechanism that causes  
54 rapid adaptive radiation through acquisition of key innovations, penetration of new environments and  
55 extinction of competitors<sup>2,12</sup>. On the other hand, new species also arise as a result of new genetic  
56 variations being preserved which could ultimately influence the phenotypic disparity, where natural  
57 selection act on, among closely related species<sup>13</sup>. In the rapid speciation of the African cichlid fishes,  
58 extrinsic environmental factors (e.g., ecological specialization) and genetic mechanisms (e.g., adaptive  
59 introgression) acted together to provoke the repeated adaptive radiation in geographically isolated  
60 lakes<sup>7,11,14,15</sup>.

61 The genus *Aquilegia* L. (columbine) is a well-recognized model system to study the evolutionary  
62 mechanisms underlying adaptive radiation<sup>16,17</sup>. This genus includes approximately 70 recently diversified  
63 species that are widely distributed in the temperate zones of North America and Eurasia<sup>18</sup>. Phylogenetic  
64 and geographic inferences have illustrated two independent adaptive radiations of North American and  
65 European lineages from the ancestral Asian species<sup>17,19</sup>. For example, floral diversification of the North  
66 American *Aquilegia* species is highly correlated with the pollinator specialization<sup>20-23</sup>. In contrast,  
67 ecological adaptation and geographic isolation are considered as the major driving forces promoted  
68 rapid radiation of the European species<sup>17,24</sup>. In Asia, changes in pollinator and ecological habitats are  
69 both proposed to be the underpinning mechanisms that resulted in the diversification of more than 20  
70 morphologically distinct species<sup>25,26</sup>. These Asian *Aquilegia* species constitute four highly divergent  
71 lineages corresponding to their geographic origins and have evolved relatively independently<sup>25,26</sup>.  
72 Despite this well-described evolutionary history and crucial role played by environmental factors, how

73 genetic and epigenetic factors are involved in the rapid speciation in this genus remains poorly  
74 investigated.

75 In this study, the main objective is to survey the genomes and DNA methylomes of 36 accessions  
76 from ten worldwide *Aquilegia* species from the Asian, European and North American lineages. Among  
77 the Asian species, four phylogenetically distinct species (*A. japonica*, *A. oxysepala*, *A. yabeana*, and *A.*  
78 *viridiflora*) were selected according to their geographic distributions and ecological habitats. *Aquilegia*  
79 *japonica* and *Aquilegia. oxysepala* are sister species inhabiting alpine tundra and low altitude forest  
80 niches in northeastern China, respectively<sup>25,27</sup>. Our previous studies have documented that natural  
81 selection during ecological specialization together with genetic drift under geographic isolation caused  
82 the rapid evolution of reproductive isolation between these two species<sup>25,28</sup>. Here, we further  
83 investigated how diverse evolutionary driving forces shaped genetic and epigenetic architectures of the  
84 two species in the processes of speciation and adaptation. In addition, we also evaluated patterns of  
85 nucleotide variation and cytosine methylation in the *A. yabeana* and *A. viridiflora*. The former species  
86 shares highly similar morphological traits and ecological niches with the *A. oxysepala* but is allopathically  
87 distributed in northern China. In contrast, while the *A. viridiflora* is sympatrically distributed with *A.*  
88 *yabeana* and *A. oxysepala* in northern and northeastern China, it often occupies rocky and sandy  
89 ecological niches. As a supplementary, we also examined nucleotide and cytosine methylation variation  
90 patterns of the North American and European lineages. Our study will provide a genome-wide view of  
91 how the specific genomic and epigenomic variation patterns are correlated with the diversification of  
92 *Aquilegia* species.

93

94

95

96

97

98

99

100

101

102

103

104



105

106

107

108

## 109 **Results**

### 110 **Population structure and nucleotide variation pattern**

111 Neighbor-joining (NJ) trees were reconstructed for the 36 *Aquilegia* accessions based on 689,123  
112 homozygous SNPs. The phylogenetic analysis suggested that these accessions of the ten species formed  
113 three distinct lineages corresponding to their geographic origins (**Figure 1a** and **Figure S1**). In brief, all 22  
114 accessions of the four East Asian species, *A. japonica*, *A. oxysepala*, *A. yabeana* and *A. viridiflora*,  
115 clustered as a monophyletic lineage, with the first two species and their hybrid forming a clade and the  
116 last two species grouping as a sister clade. In contrast, the West Asian species *A. fragrans* clustered with  
117 the geographically adjoining European species. The principal component analysis (PCA) and population  
118 structure inferences also revealed distinct genetic structure of the three phylogenetic lineages (**Figure**  
119 **1b** and **c**). It should be noted that one *A. alpina* var. *alba* accession shared the same ancestral genetic  
120 cluster with the North American lineage, while the putative hybrid of the *A. oxysepala* and *A. japonica*  
121 possessed an admixed genetic background (**Figure 1b** and **c**).

122 To further gain an insight into genome-wide nucleotide variation pattern of the ten *Aquilegia*  
123 species, we calculated nucleotide diversity ( $\pi$ ) and genetic divergence ( $F_{ST}$ ) for each chromosome and for  
124 100-kb sliding windows, respectively. Among the three phylogenetic lineages, the Asian *Aquilegia*  
125 species harbored the highest nucleotide diversity compared to the European and North American  
126 lineages across the seven chromosomes (**Figure S2**). By comparing the nucleotide diversity for each 100-  
127 kb sliding window, we observed a moderate correlation of genome-wide variation pattern among the  
128 three lineages (Spearman  $R = 0.42-0.56$ ) and a high correlation between the *A. oxysepala* and *A.*  
129 *japonica* (Spearman  $R = 0.70$ ) (**Figure S3**). In particular, 116 of 241 low genetic diversity genomic regions  
130 (LDGRs, with 5% lowest  $\pi$ ) were shared by at least two of the three lineages (**Figure S4**). Between the *A.*  
131 *oxysepala* and *A. japonica*, while we defined 148 LDGRs and 148 high divergence genomic regions  
132 (HDGRs, with 5% highest  $F_{ST}$ ), only seven candidate genomic regions overlapped (**Table S1**).

133

134

135

136

137  
138  
139  
140  
141

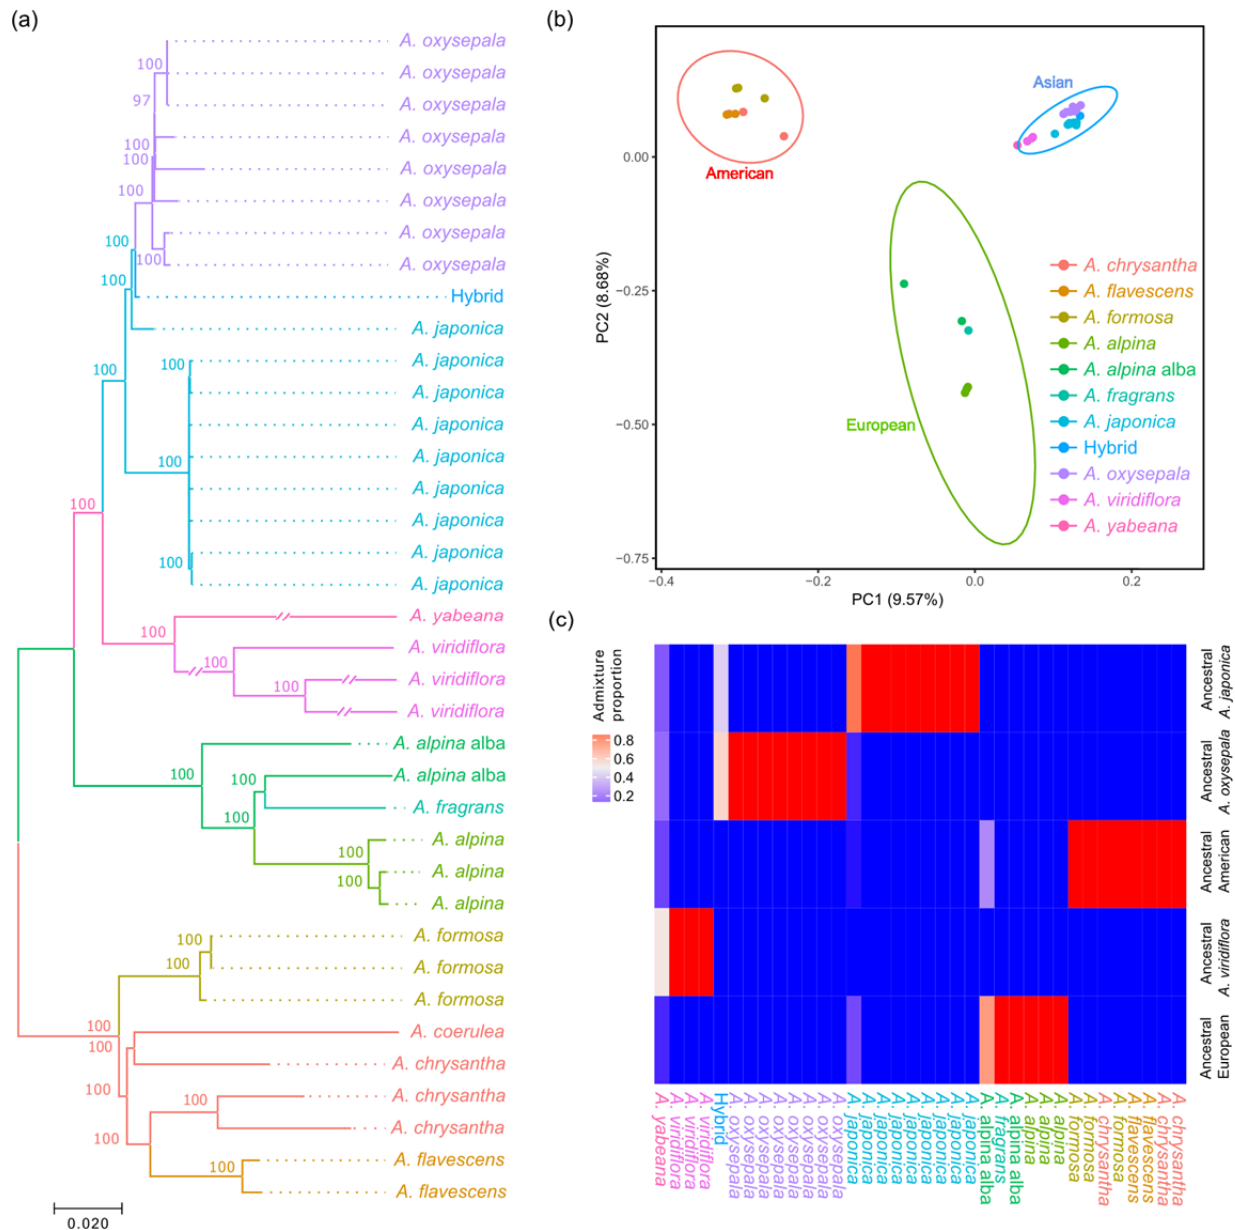

142  
143 **Figure 1. Phylogenetic relationship and population structure of the ten worldwide *Aquilegia* species.**  
144 (a) Phylogenetic tree of the 36 accessions constructed by neighbor-joining algorithm based on 689,123  
145 whole-genome SNPs. (b) PCA reveals genetic similarity within each of the three lineages and genetic

146 disparity between lineages based on 15,988 LD-pruned SNPs. Ellipses of each lineage denote 99%  
147 confidence region estimated from distribution of the first two principal components. (c) Population  
148 admixture of the 36 *Aquilegia* accessions.

149

## 150 **Identification of the genomic regions indicating selection pressure and highly impactful genetic** 151 **variations**

152 Candidate genes or genomic regions associated with adaptive divergence were determined from three  
153 perspectives. First, we considered genes localized within the regions that showed low intra-specific  
154 diversity but high inter-specific divergence to be representative of intra-specific genetic differences. We  
155 thus identified 23 genes from the above seven candidate genomic regions that were both HDGRs and  
156 LDGRs shared by *A. oxysepala* and *A. japonica* (**Table S1**). Genes within these genomic regions were  
157 functionally associated with meiotic nuclear division, adenine methyltransferase and basic cellular  
158 activities.

159 While the first strategy mainly relied on genome-wide scanning for 100-kb non-overlapping sliding  
160 window, we also employed a functional annotation-based approach to identify highly impactful  
161 conservative clade-specific variations (CCVs) from both the within and between lineage comparisons.  
162 Our results revealed that a considerable proportion (17.9-40.5%) of the CCVs were identified in the gene  
163 body regions (**Table S2**). We then examined the potential functional impacts of genes harboring these  
164 identified CCVs. Between the *A. oxysepala* and *A. japonica*, the CCV-carrying genes were enriched in  
165 several vital biological pathways related to cell reproduction, including telomere maintenance, DNA  
166 repair, and DNA helicase activity (**Figure 2** and **Table 1**). For example, two candidate genes  
167 (*Aqcoe6G160300* and *Aqcoe7G062500*) coding for *Xklp2* (*TPX2*) were functionally correlated with spindle  
168 assembly during the mitotic process (27, 28). Among the three phylogenetic lineages, the CCV-  
169 harboring genes were also functionally involved in the mitotic chromosome condensation, DNA ligase  
170 activity and aminopeptidase activity (**Figure 2** and **Table 1**). For instance, two CCV-containing genes  
171 (*Aqcoe2G276600* and *Aqcoe1G273400*) encoding DNA mismatch repair proteins *MutS/MSH* and *MutS2*  
172 (ref. 29) carried one Asian-specific-to-American frameshift variant.

173 Thirdly, we also derived pair-wise synonymous ( $d_s$ ) and non-synonymous ( $d_N$ ) mutation rate to  
174 identify genes informative of positive or purifying selection pressure. We found that species within the  
175 Asian lineage experienced significantly stronger positive ( $d_N/d_s > 1$ ) and purifying ( $d_N/d_s < 1$ ) selection  
176 pressures compared to the European and North American lineages (Wilcoxon rank sum test, all  
177 Bonferroni-corrected  $p$  values  $< 1.5 \times 10^{-16}$ ) (**Figure S5**). Likewise, the European species showed

178 significantly stronger purifying selection (Wilcoxon rank sum test, Bonferroni-corrected  $p$  value =  $7.8 \times 10^{-8}$ )  
 179 compared to the North American species.

180  
 181  
 182

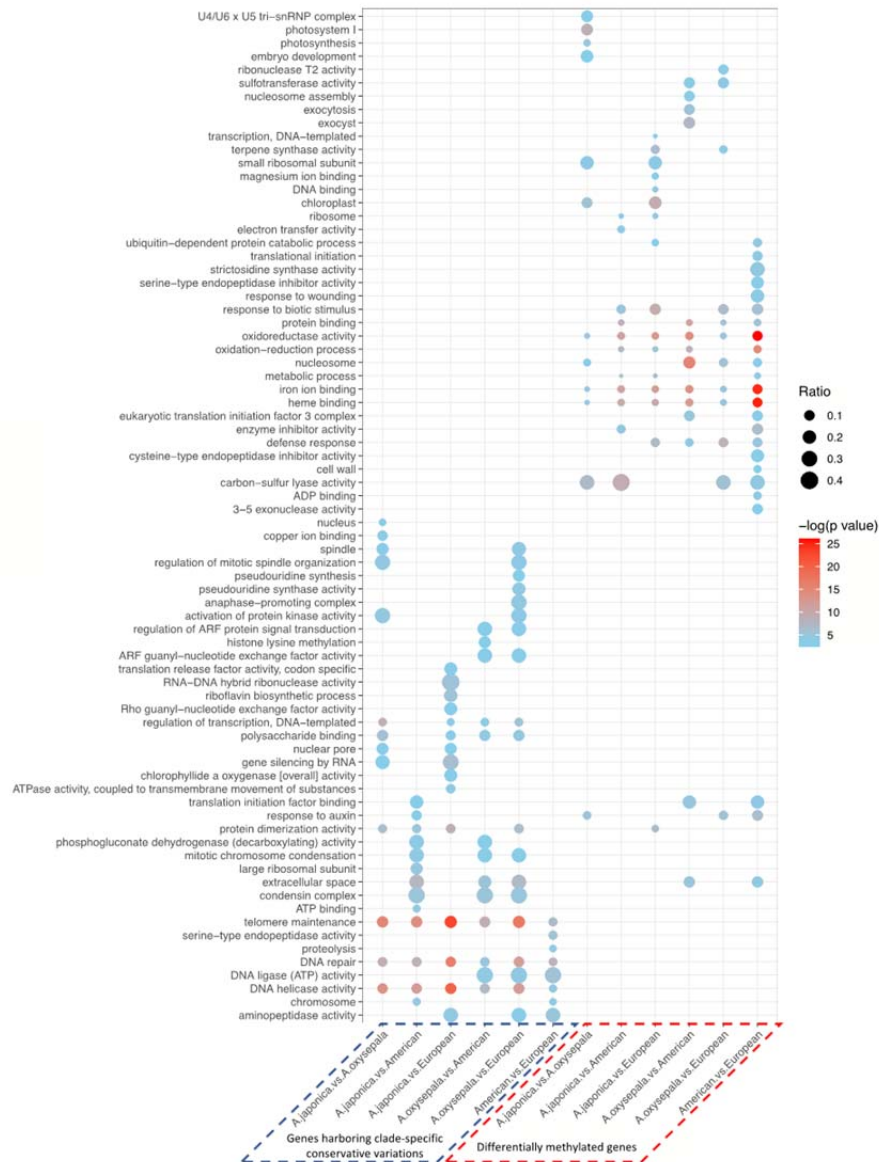

183  
 184 **Figure 2. Functional enrichment of genes harboring highly impactful CCVs and DMGs.** CCV-containing  
 185 genes specific to either of the two lineages/species being compared were merged to construct a target

186 gene set. Ratio denotes proportion of CCV-containing genes or DMGs in the corresponding gene set of  
 187 interest. Absence of dot indicates no significant enrichment.

188

189

190

191 **Table 1.** Information of the high-impact conservative clade-specific variants (CCVs) in the cell  
 192 reproduction related genes.

| Gene          | Variant-carrying    | Reference           | Chromosome | Position | Reference allele         | Variant     | Annotation | Gene function                                       |
|---------------|---------------------|---------------------|------------|----------|--------------------------|-------------|------------|-----------------------------------------------------|
| Aqcoe1G273400 | Asian               | American            | Chr1       | 18994915 | GAA                      | GAAA        | frameshift | DNA mismatch repair protein <i>MutS2</i>            |
| Aqcoe2G151500 | European            | American            | Chr2       | 15305837 | A                        | G           | splicing   | PIF1-like helicase                                  |
|               | European            | American            |            | 15307442 | A                        | C           | stop gain  |                                                     |
|               | European            | American            |            | 15309865 | AATATATAT                | AATATATATAT | frameshift |                                                     |
|               | European            | Asian               |            | 15307442 | A                        | C           | stop gain  |                                                     |
|               | European            | Asian               |            | 15309865 | AATATATAT                | AATATATATAT | frameshift |                                                     |
|               | <i>A. oxysepala</i> | <i>A. japonica</i>  |            | 15305837 | A                        | G           | splicing   |                                                     |
|               | <i>A. oxysepala</i> | <i>A. japonica</i>  |            | 15309267 | AT                       | A           | frameshift |                                                     |
| Aqcoe2G177700 | European            | American            | Chr2       | 21794397 | TATGCACCAAAGGTATCACGATGC | TATGC       | frameshift | PIF1-like helicase                                  |
|               | European            | American            |            | 21794979 | TT                       | TTGT        | frameshift |                                                     |
|               | European            | Asian               |            | 21794397 | TATGCACCAAAGGTATCACGATGC | TATGC       | frameshift |                                                     |
|               | <i>A. oxysepala</i> | <i>A. japonica</i>  |            | 21795089 | CA                       | C           | frameshift |                                                     |
| Aqcoe6G208600 | European            | American            | Chr6       | 15364081 | A                        | ATCTCTTCG   | frameshift | PIF1-like helicase                                  |
|               | European            | Asian               |            | 15364081 | A                        | ATCTCTTCG   | frameshift |                                                     |
|               | <i>A. japonica</i>  | <i>A. oxysepala</i> |            | 15364330 | TAA                      | TA          | frameshift |                                                     |
| Aqcoe6G253800 | European            | American            | Chr6       | 22789898 | C                        | T           | stop gain  | DNA helicase                                        |
|               | European            | American            |            | 22790012 | G                        | A           | splicing   |                                                     |
|               | European            | Asian               |            | 22789898 | C                        | T           | stop gain  |                                                     |
|               | <i>A. japonica</i>  | <i>A. oxysepala</i> |            | 22790012 | G                        | A           | splicing   |                                                     |
| Aqcoe2G276600 | Asian               | American            | Chr2       | 33314422 | AGGGGGG                  | AGGGGGG     | frameshift | DNA mismatch repair protein <i>Msh6</i>             |
| Aqcoe6G160300 | <i>A. japonica</i>  | <i>A. oxysepala</i> | Chr6       | 9414625  | G                        | A           | stop gain  | <i>TPX2</i>                                         |
| Aqcoe7G062500 | <i>A. oxysepala</i> | <i>A. japonica</i>  | Chr7       | 3789055  | G                        | A           | stop gain  | cell cycle regulated microtubule associated protein |

193

194

195

196

197

198

199

200

201

202

203

204

205

206

207

208

209

## 210 **CG methylation patterns and differentially methylated genes**

211 In parallel with the above genomic analyses, we also investigated CG methylation pattern of the  
212 representative *Aquilegia* species. Despite variability across the 36 *Aquilegia* accessions, the North  
213 American, Asian and European species showed no distinguishable differences (*t* test, all Bonferroni-  
214 corrected *p* values > 0.01) in overall percentage of methylated cytosines (**Figure 3a**). We then performed  
215 PCA to examine the CG-cytosine methylomic diversity of all the *Aquilegia* accessions. The resulting  
216 overall methylation pattern highly resembled the above genomic inferences, with the European and  
217 American species forming two distinct groups and the four Asian species forming three separate clusters  
218 (**Figure S6**). We then assessed the CG methylation patterns for the European and North American  
219 lineages as well as the three Asian species (*A. japonica*, *A. oxysepala* and *A. viridiflora*) separately.  
220 Consistent with the described genomic features, heterogeneous pattern of the CG methylation was also  
221 observed for the seven chromosomes, with the chromosome 4 demonstrating obviously higher overall  
222 CG methylation divergence compared to the other six chromosomes (**Figure 3b**). We further quantified  
223 CG methylation level deposited in the genic regions, putative *cis*-regulatory regions and CG island,  
224 respectively. In genic and regulatory regions, all three lineages shared similar modification patterns with  
225 apparent depletion of CG methylation around the transcription start site (TSS) and transcription end site  
226 (TES) (**Figure 3c**). However, the American lineage exhibited hyper-methylation (more than 10%) around  
227 the center of CG islands and a more drastic decrease throughout the CG island shores compared to the  
228 European and Asian species (**Figure 3d**).

229 To examine the biological impacts of CG methylation on the species diversification, differentially  
230 methylated regions (DMRs) and differentially methylated genes (DMGs) were identified for both within-  
231 and between-lineage comparisons, respectively (**Tables S3** and **S4**). Within the Asian lineage, 3,622  
232 DMRs in 2,899 DMGs were identified between the *A. japonica* and *A. oxysepala*. Functional enrichment  
233 of these DMGs indicated that the two species may have different activities in photosynthesis-related  
234 pathways, including photosystem I, photosynthesis and chloroplast (**Figure 2**). For example, two  
235 photosynthesis-related genes, *PsaA/PsaB* and *CemA*, showed significantly differential methylation  
236 between the two species in the genic regions (**Figure S7a** and **b**). At the inter-lineage level, apparently

237 more DMGs were identified between the North American and European species (6,087 genes)  
238 compared to those of between the two lineages and Asian species (3,308-5,003 genes) (**Table S3** and **S4**).  
239 DMGs characterized from the inter-lineage comparisons were mainly involved in the plant growth (e.g.,  
240 response to auxin) and defense, response to biotic stimulus and wounding (**Figure 2**).

241 We then examined whether the candidate genes (CCV-carrying genes and DMGs) superimposed on  
242 the same signature of natural selection. We found while a considerable proportion of the candidate  
243 genes were shared for each of the genetics- and epigenetics-based assessments (**Figure S8**), they  
244 showed a segregated distribution pattern across all comparisons (**Figure S9**). Likewise, the Gene  
245 Ontology (GO) enrichment analyses of the candidate gene identified from the genetic and epigenetic  
246 levels were enriched in functionally complementary pathways (**Figure 2**), suggesting co-existence of  
247 different underlying evolutionary mechanisms.

248  
249  
250  
251  
252  
253  
254  
255  
256  
257  
258  
259  
260  
261  
262  
263  
264  
265  
266  
267  
268



269  
270  
271  
272  
273

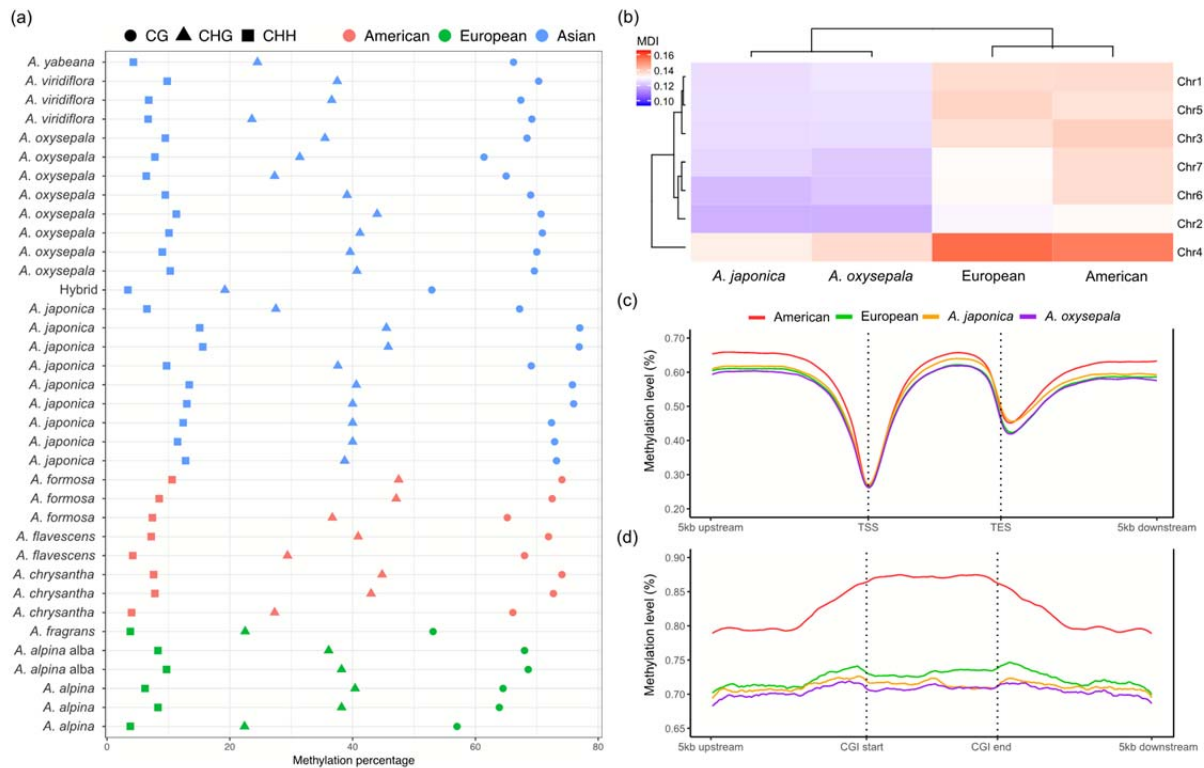

274  
275 **Figure 3. Patterns of cytosine methylation for the ten worldwide *Aquilegia* species.** (a) Genome-wide  
276 cytosine methylation levels of 36 accessions. (b) MDI illustrates chromosome-level CG methylation  
277 similarity. *Aquilegia viridiflora* was used as the reference. (c) CG methylation profiling in genic region  
278 across the four *Aquilegia* groups. Each row represents one genic region starting at 5-kb upstream of its  
279 TSS and terminating at 5-kb downstream of its TES, sorted by mean methylation level of all analyzed CG  
280 loci. Gene body regions were scaled to have the same length. (d) CG methylation profiling in and around  
281 CG islands.

282  
283  
284  
285  
286



287  
288  
289  
290  
291

## 292 **Association between epigenetic variability and genetic variations**

293 Since both genetic variation and differential CG methylation seemed to have crucial and multifaceted  
294 influences on the adaptation of the ten *Aquilegia* species, we wondered whether differential epigenetic  
295 modifications were dependent on genetic variations. Among the 588,659 CG loci examined, 224,222  
296 (38.09%) carried a CG-loss variation. We then illustrated epigenetic variability for the variation-carrying  
297 and non-variant CG loci, respectively. As shown in Figure 4, genetic-epigenetic associations of varying  
298 magnitude were observed in both types of CG loci. The variation-carrying CG loci conveyed information  
299 that highly resembled their genetic background. The overall methylation pattern was highly conserved  
300 within the same species but exhibited obvious divergence across the ten *Aquilegia* species (**Figure 4a**). In  
301 contrast, CG methylation divergence at the non-variant CG loci varied with higher variability at both the  
302 intra- and inter-specific levels (**Figure 4b**). By examining the correlation of genetic variability and  
303 cytosine methylation, we found that CG methylation divergence at variation-carrying CG-site was largely  
304 attributable to the CG-loss variations (**Figure 4c**). In particular, 75% of the CG-loss variations occurring at  
305 the most highly variable CG-methylated dinucleotides could explain at least 75% of the total epigenetic  
306 variability *per se*. Nevertheless, there was still a considerable proportion of epigenetic variability that  
307 could not be sufficiently explained by the variant-CG locus (**Figure 4d**).

308 We also attempted to identify *cis*-driver mutations for each of the 1,229 DMRs between the *A.*  
309 *japonica* and *A. oxysepala*. Our results revealed that only 568 out of the 1,229 (46.2%) DMRs were  
310 significantly associated with at least one genetic variation inside or around a 500 base-pair (bp)  
311 upstream/downstream genomic region, even under the least stringent  $p$  value threshold ( $5 \times 10^{-5}$ ),  
312 indicating that the epigenetic changes were only partially dependent on *cis*-genetic driving mutations  
313 (**Figure 4e**). Moreover, we observed weak yet significant associations between differential CG  
314 methylation and selection pressure. In most inter-lineage comparisons, DMGs were significantly more  
315 prone to be under positive selection than non-DMGs (**Table 2**), suggesting that epigenetic modifications  
316 could probably assist selection pressure in shaping genotypes. In contrast, DMGs were significantly less  
317 prone to be under purifying selection (**Table 2**).

318

319  
320  
321  
322  
323

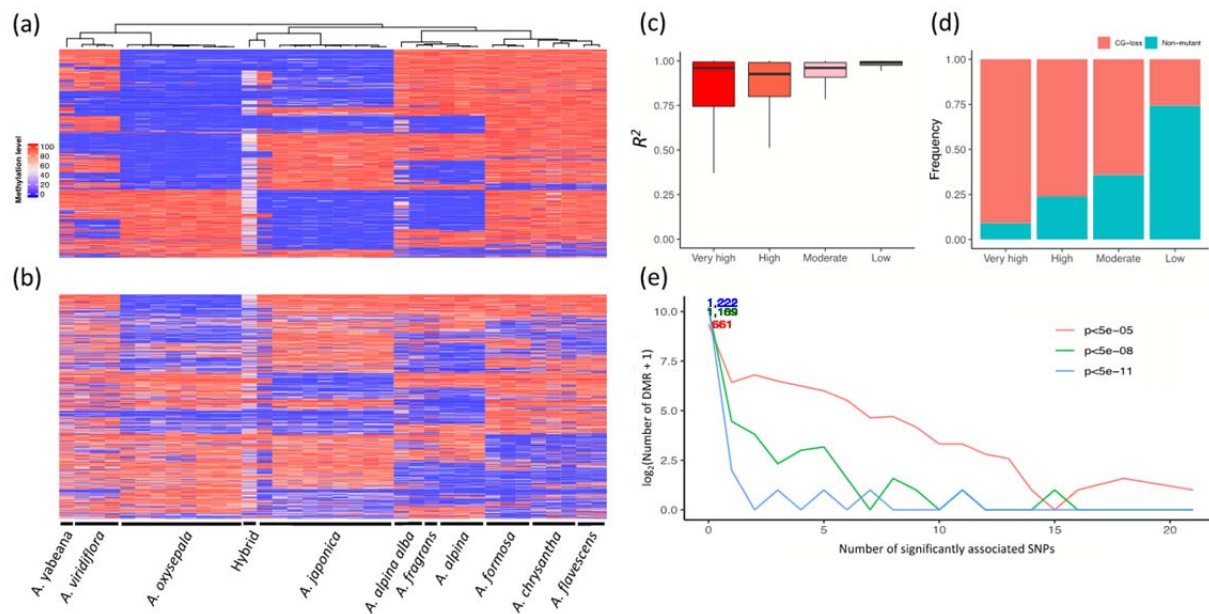

324  
325 **Figure 4. Association between CG-loss variations and epigenetic variability.** (a) Top 3,000 most variable  
326 CG loci containing CG-loss variations. (b) Top 3,000 most variable non-variant CG loci across 36  
327 accessions show clade-specific methylation patterns. CG methylation in the hybrid tends to be  
328 neutralized possibly due to heterozygosity. (c) Linear regression demonstrates that CG-loss variations  
329 explain a large proportion of CG methylation variation. (d) Summary of composition of each category  
330 with regard to whether each CG locus contains a CG-loss variation. Epigenetic variability was determined  
331 by standard deviation in methylation  $\beta$  value across all 36 accessions. CG loci with top 10,000, 10,001-  
332 50,000 and 50,001-150,000 largest standard deviation were ordinally labelled as possessing “very high”,  
333 “high” and “moderate” variability respectively. The rest CG loci were labelled as possessing “low”  
334 variability. (e) Association test shows most DMRs were independent of *cis*-acting SNPs. Results under  
335 different significance levels are compared in this exploratory analysis.

336  
337  
338

339  
340  
341  
342  
343  
344  
345  
346  
347  
348  
349  
350  
351  
352  
353  
354  
355  
356  
357  
358  
359  
360  
361  
362  
363  
364  
365  
366  
367

**Table 2.** Significant correlation between differential methylation and natural selection.

| Type of selection   | Differential methylation | Jap-Oxy * | Jap-Ame | Jap-Eur | Oxy-Ame | Oxy-Eur | Ame-Eur |
|---------------------|--------------------------|-----------|---------|---------|---------|---------|---------|
| Positive selection  | DMG                      | 7.2%      | 7.3%    | 11.9%   | 6.7%    | 8.4%    | 8.9%    |
|                     | non-DMG                  | 4.4%      | 5.0%    | 5.6%    | 4.7%    | 5.4%    | 5.4%    |
|                     | <i>p</i> value           | 0.11      | 7.3e-02 | 3.9e-05 | 6.7e-02 | 1.8e-02 | 2.8e-04 |
| Purifying selection | DMG                      | 3.1%      | 1.8%    | 2.4%    | 2.3%    | 2.0%    | 1.9%    |
|                     | non-DMG                  | 4.3%      | 4.3%    | 4.7%    | 4.9%    | 5.1%    | 4.0%    |
|                     | <i>p</i> value           | 0.53      | 3.2e-02 | 9.1e-02 | 1.3e-02 | 8.4e-03 | 1.0e-02 |

\*: Each percentage represents the proportion of genes belonging to either DMGs or non-DMGs compared between the two corresponding clades that are under corresponding or higher strength of positive selection. For example, 7.2% indicates that 7.2% DMGs compared between *A. japonica* and *A. oxyssepala* are under strong selection; 4.4% indicates that 4.4% non-DMGs compared between these two species are under strong selection. *p* values were obtained from Chi-square tests and were not adjusted for multiple testing due to dependence arising from overlapping gene sets.

Jap: *A. japonica*; Oxy: *A. oxyssepala*; Ame: American; Eur: European

368

369

370

371

372

373 **Discussion**

374 **Genetically determined mechanisms associated with the rapid diversification of *Aquilegia* species**

375 Elucidating evolutionary mechanisms underpinning species diversification is crucial to understanding the  
376 evolution and persistence of biodiversity<sup>2,5,6</sup>. The genus *Aquilegia* provides an ideal system to address  
377 how the diverse evolutionary mechanisms promoted rapid adaptive radiation<sup>16,17</sup>. Although various  
378 environmental conditions related to ecological opportunities, such as shifts in pollinator and habitat,  
379 have been proposed to facilitate the evolution of reproductive isolation<sup>21,25</sup>, genetic basis associated  
380 with the rapid diversification of *Aquilegia* species has still remained largely unclear. In this study, we  
381 surveyed the genomes of ten worldwide *Aquilegia* species to address whether specific genetic  
382 architectures have been involved in the rapid species diversification. Broadly consistent with previously  
383 inferred phylogeny<sup>17,19,25,30</sup>, the ten *Aquilegia* species from Asia, Europe and North America formed three  
384 phylogenetically independent lineages corresponding to their geographic origins. This attribute renders  
385 the *Aquilegia* species a suitable system to identify genomic variations associated with the repeated  
386 adaptive speciation by extensive comparisons from different facets.

387 It has been proposed that if a genetic factor is the potential determinant promoting adaptive  
388 speciation, one would expect to identify specific genetic architectures in the diversified lineages<sup>8,14,31</sup>. In  
389 Darwin's finches, for example, polyphyletic topology was observed as a general pattern in 14  
390 morphologically distinct species, phenotypic diversity of the beak shape was mainly determined by  
391 natural selection acting on the *ALX1* gene during the ecological specialization process<sup>8</sup>. A similar  
392 phenomenon was observed in the East African cichlid fish where the radiating lineages are more  
393 dynamic in terms of gene content and transcriptomic landscape compared to their non-radiating  
394 relatives<sup>14,31</sup>. In this study, the genome-wide nucleotide variation pattern highly reflects the evolutionary  
395 history that the Asian, European and North American *Aquilegia* species have clearly diverged and  
396 evolved allopatrically in respective geographic regions. This also suggests that a considerable proportion  
397 of the genetic variations and changes in environment are intertwined during the diversification process.  
398 As expected, our genome-wide scanning for selection signatures revealed distinct positive and purifying  
399 selection modes in the intra- and inter-lineage comparisons. More importantly, the CCV-carrying genes

400 identified from the three lineages are associated with cell reproduction (e.g., telomere maintenance and  
401 mitotic chromosome condensation) and other functionally important traits. Similar genomic feature was  
402 also observed in *A. japonica* and *A. oxysepala*. Our previous studies have demonstrated that natural  
403 selection and genetic drift together resulted in the rapid evolution of reproductive isolation<sup>25,30</sup>. Here,  
404 we further demonstrate that candidate genes involved in the adaptive speciation are functionally  
405 enriched in the pathways related to cell reproduction (e.g., telomere maintenance), stress tolerance  
406 (e.g., response to wounding) and basic cellular activities. It should be noted that although a majority of  
407 the enriched pathways are specific to each comparison, enrichment of cell reproduction-related  
408 pathways (e.g., telomere maintenance, DNA repair and DNA helicase activity) and stress tolerance are  
409 shared in the intra- and inter-lineage comparisons. Taken together, these findings indicate that specific  
410 genetic determinants might have conferred high adaptability to the *Aquilegia* species to cope with  
411 different environmental conditions.

412

#### 413 **Evolutionary potential of cytosine methylation in the adaptation of *Aquilegia* species**

414 The role of epigenetic modification in the long-term evolutionary process has long been debated<sup>32-34</sup>. It  
415 has been proposed that epigenetic variations are frequently under the genetic control which can alter  
416 rapidly as a result of environmental induction and stochastic epimutation<sup>35,36</sup>. Nevertheless, it has also  
417 been recognized that some epigenetic variations can persist over generations and be highly correlated  
418 with phenotypic diversity<sup>32</sup>. As illustrated in *Arabidopsis*, changes in cytosine methylation can produce  
419 meiotically stable epialleles, which could eventually lead to phenotypic diversity in the absence of  
420 genetic variations<sup>37-39</sup>. Here, we assessed whether the epigenetic modifications were also associated  
421 with the adaptive speciation of the *Aquilegia* species. Consistent with the genomic features detailed  
422 above, high divergence of cytosine methylation was observed across the Asian, European and North  
423 American lineages. Notably, differential cytosine methylation was not only found across the seven  
424 chromosomes but also evident in the gene body of DMGs and CG island region among the three lineages.  
425 Particularly, functional enrichment analyses identified significant associations with adaptation-related  
426 traits, including plant growth, stress tolerance and basic cellular activities. For example, the candidate  
427 DMGs identified between the *A. japonica* and *A. oxysepala*, showed significant enrichment in pathways  
428 related to diverse important phenotypic traits, such as photosynthesis, embryo development and  
429 response to auxin. These features indicated that epigenetic factors might also play a role in response to  
430 diverse environmental conditions.

431 We noted that some candidate genes and enriched pathways had shared hotspots of both genetic  
432 and epigenetic disparities, especially those related to cell reproduction, plant growth and stress  
433 tolerance. Many studies based on human and mouse have shown that genetic variations can manipulate  
434 *cis*-CG methylation at specific loci to further influence phenotypes, where CG methylation serves as a  
435 mediator<sup>40,41</sup>. By analyzing the associations between genetic and epigenetic variability, we conclude that  
436 while many CG-loss variations can directly lead to depletion of CG methylation, a lot of DMRs are not  
437 manipulated by any *cis*-variations. Since gene body CG methylation in plants generally stabilizes gene  
438 expression and is positively correlated with gene expression<sup>42-45</sup>, differential methylation in our study is  
439 indicative of likely differential amount of gene products. Based on these attributes together with the  
440 plausible associations between differential methylation (e.g., DMGs) and positive selection (e.g.,  $d_N/d_S$ ),  
441 we propose that epigenetic modification may be a complementary mechanism facilitating phenotypic  
442 diversity of the *Aquilegia* species.

443

#### 444 **Limitations and future directions**

445 We realized that this study has some limitations. First, the small sample size in this study may  
446 introduce bias and inflation of false positives, and we postulate that our findings should be interpreted  
447 carefully and considered exploratory. When the association between genetic divergence and  
448 evolutionary events is investigated, it is impossible to deny the roles of other evolutionary forces. We  
449 acknowledge that the lineage-specific allele frequencies are possibly consequences of genetic drift, and  
450 genetic hitchhiking may lead to identification of candidate genes residing in neighboring genomic  
451 regions representing the other driving forces. Therefore, we claim that the candidate genes identified to  
452 be associated with adaptive radiation do not necessarily point towards causal evolutionary mechanisms.  
453 They may also be by-products of the long-term process of adaptive radiation. In addition, we never than  
454 less only focused on analysis of CG methylation as puzzles persist regarding the functional roles of CHG  
455 and CHH methylation. We also expect that future studies with larger sample sizes will be able to  
456 improve the statistical power and investigate *trans*-genetic control.

457

458

459

460

461

462

463  
464  
465  
466  
467  
468  
469

## 470 **Methods and Materials**

### 471 **Sample collection, DNA extraction and whole-genome sequencing**

472 In this study, a total of 36 accessions from ten worldwide *Aquilegia* species were collected (**Table S5**).  
473 Among the Asian species, four phylogenetically distinct species (*A. japonica*, *A. oxysepala*, *A. yabeana*,  
474 and *A. viridiflora*) are selected according to their geographic distributions and ecological habitats.  
475 *Aquilegia japonica* and *A. oxysepala* are sister species inhabiting alpine tundra and low altitude forest  
476 niches in northeastern China, respectively<sup>25,46</sup>. Eighteen accessions were collected to represent these  
477 two Asian species and their putative hybrid. In addition, four accessions were collected from the other  
478 two Asian species, *A. yabeana* and *A. viridiflora*. The former species shares highly similar morphological  
479 traits and ecological niches with *A. oxysepala* but is allopatrically distributed in the northern China. In  
480 contrast, *A. viridiflora* is sympatrically distributed with *A. yabeana* and *A. oxysepala* in the northern and  
481 northeastern China, but often occupies rocky and sandy ecological niches. Furthermore, six and eight  
482 accessions were sampled from the European and North American lineages, respectively. All the 36  
483 accessions were grown in green house under the same conditions (25°C/12 hours, 16°C/12 hours).  
484 Genomic DNA was extracted from fresh mature leaves using TianGen plant genomic DNA kit. Whole  
485 genome resequencing and bisulfite sequencing were performed on the extracted genomic DNA using  
486 the Illumina X-ten platform (Illumina, California, USA). Short-insert (350 bp) DNA libraries of all  
487 accessions were constructed by NovoGene (NovoGene, Tianjin, China). Genome assembly of an admixed  
488 species *A. coerulea* “Goldsmith” was obtained from Phytozome v12.1 (<https://phytozome.jgi.doe.gov>) as  
489 the reference genome<sup>16</sup>.

490

### 491 **Sequence assembly, functional annotation and genetic diversity**

492 Whole genome sequences of each accession were aligned against the reference genome using default  
493 settings of the BWA-MEM algorithm implemented in Burrows-Wheeler Aligner (BWA)<sup>47</sup>. Raw assemblies  
494 were realigned using IndelRealigner provided in the Genome Analysis Tool Kit by default settings<sup>48</sup>.



495 Single nucleotide polymorphisms (SNPs) and insertions/deletions (INDELs) were reported using  
496 SAMtools<sup>49</sup>. Only the high-quality variants (SNPs and INDELs) (read depth > 3, mapping quality > 20 and  
497 missing allele < 1%) were retained for subsequent population genomics analyses. Genomic annotation of  
498 the identified variants was reported for each of the 36 samples separately. Functional annotation of  
499 each identified variant was performed using SnpEff, based on the reference genome<sup>50</sup>.

500 To infer the phylogenetic relationship between the ten *Aquilegia* species, NJ trees were  
501 reconstructed for each chromosome and the whole genome dataset using MEGA 7(ref. 51). PCA was  
502 carried out to examine the genetic diversity of the 36 *Aquilegia* accessions<sup>52</sup>. Ancestral components  
503 were estimated using ADMIXTURE<sup>53</sup> with different number of populations ranging from one to ten.  
504 Optimal population composition with the least 5-fold cross-validation error was selected to decompose  
505 ancestral admixture. To obtain the genome-wide nucleotide variation pattern, nucleotide diversity ( $\pi$ )  
506 and genetic differentiation (Weir and Cockerham's  $F_{ST}$ ) were calculated for each 100 kb non-overlapping  
507 sliding window using VCFtools<sup>54,55</sup>. Pair-wise non-synonymous-to-synonymous ( $d_N/d_S$ ) ratios of the ten  
508 species were inferred by yn00 program in the Phylogenetic Analysis by Maximum Likelihood (PAML)  
509 package<sup>56</sup>. Inter-lineage  $d_N/d_S$  value for each gene was derived by averaging  $d_N/d_S$  values obtained from  
510 all pairwise comparisons of samples belonging to the two lineages under investigation. Candidate genes  
511 with the 5% highest and 5% lowest  $d_N/d_S$  values were considered to have undergone strong positive and  
512 purifying selection, respectively.

513

#### 514 **Cytosine methylation pattern and epigenetic population structure**

515 Whole genome bisulfite sequencing data were pre-processed using TrimGalore ([https://www.  
516 bioinformatics.babraham.ac.uk/projects/trim\\_galore/](https://www.bioinformatics.babraham.ac.uk/projects/trim_galore/), accessed August 21, 2018). Paired-end reads  
517 were then aligned to the reference genome using Bismark<sup>57</sup> with a moderately stringent minimum-score  
518 function (L,0,-0.3). De-duplicated alignments of the 36 *Aquilegia* accessions were used to report cytosine  
519 methylation level using "Bismark\_Methylation\_Extractor", on loci with a read depth  $\geq 3$ . Genomic  
520 annotations of the methylated cytosine site were identified based on the reference genome using an in-  
521 house Python script. PCA was conducted for 588,659 loci which were passed the quality control to infer  
522 the CG-methylomic diversity of the ten *Aquilegia* species. Differential cytosine methylation was  
523 determined at the gene and chromosome levels, respectively. At the gene level, we determined DMRs  
524 for each 100 bp non-overlapping sliding window using Cochran-Mantel-Haenszel (CMH) test to account  
525 for imbalanced read depth (Supplementary Notes). Genomic regions that possessed a Benjamin-  
526 Hochberg adjusted  $p$  value < 0.05 and showed inter-specific or inter-lineage methylation divergence



527 higher than 25% were defined as significant DMRs. Genes with > 20% of the genic region being DMR(s)  
528 were defined as DMGs. Chromosome level methylation patterns were measured by chromosomal  
529 methylation discrepancy index (MDI)<sup>58</sup>. Methylation patterns of the identified DMGs were visually  
530 confirmed on Integrative Genomics Viewer<sup>59</sup> prior to downstream analyses and biological interpretation.  
531 In addition, we identified CG islands from the *A. coerulea* “Goldsmith” reference genome using EMBOSS  
532 cpgplot with default settings<sup>60</sup>. Only the identified CG-enriched genomic regions with > 200 bp were  
533 defined as CG islands. We then investigated inter-specific and inter-lineage methylation patterns in and  
534 around the CG islands.

535

### 536 **Associations between the genetic variation and cytosine methylation**

537 We tested for associations between the identified DMGs and genes under positive selection by a Chi-  
538 square test. Linear regression model was adopted to measure the direct causal effect of CG-loss  
539 variation on CG methylation. To further assess whether genetic variations drive the establishment of  
540 DMG, driving mutations of DMRs between the *A. japonica* and *A. oxysepala* were identified using an  
541 Eigenstrat-based method (See Supplementary Notes for more details)<sup>61</sup>.

542

### 543 **Identification of conservative clade-specific variant**

544 CCVs were defined as variants that had a SnpEff-predicted “high” functional impact and that were  
545 conserved across all samples belonging to the same species or lineage, but not present in any sample of  
546 the other species/lineages. Since the biological consequences of heterozygous variants were less  
547 affirmable, only the homozygous point mutations and INDELs were included in the characterization of  
548 CCVs, including frameshift, stop-gain, stop-loss, start-loss and splicing-alteration variations.

549

### 550 **Functional analysis**

551 The above mentioned genetic and epigenetic analyses helped to identify relevant candidate genes,  
552 which might be associated with the rapid diversification of the *Aquilegia* species from different  
553 perspectives. These candidate genes were employed to conduct functional enrichment analyses using  
554 the R package topGO with default settings<sup>62</sup>. Enriched GO terms that possessed a *p* value <0.05 were  
555 considered statistically significant. Since the statistical tests performed by topGO are not independent,  
556 multiple testing correction does not apply here<sup>62</sup>. Structures of functional domains of targeted genes  
557 were determined based on the InterPro database (<https://www.ebi.ac.uk/interpro>, accessed January 25,

558 2019). Distribution patterns of the identified candidate genes and their related functional pathways  
559 were visualized using the R package jvenn<sup>63</sup>.

560

561

562

563

564

#### 565 **Data availability**

566 All data generated from the study were submitted to EBI under the accession number PRJEB34182. All  
567 scripts for conducting computational analyses are available upon reasonable request to the  
568 corresponding author.

569

#### 570 **Author Contributions**

571 L.F.L., J.Z and A.S.X conceived this project. Z.H.W, T.L. and M.R.L. developed statistical analysis pipeline.  
572 Z.H.W., T.L., M.R.L., N.D., L.Z.L., Y.J.H and X.G. carried out experiments and analyzed the data. T.L.,  
573 M.R.L., N.D., Z.H.W., L.Z.L., X.G., and L.F.L. participated in discussion and interpreted the data. Z.H.W, T.L.  
574 and L.F.L. wrote the manuscript. All authors read and approved the manuscript.

575

#### 576 **Acknowledgments**

577 We are very grateful to Aköz Gökçe for her constructive comments on our manuscript. We appreciate Dr.  
578 Peng Jiang, Zhang Zhang, and the USDA for kindly providing the seeds of the *Aquilegia* species.

579

#### 580 **Funding:**

581 This work was financially supported by National Natural Science Foundation of China (31670382),  
582 Shanghai Pujiang Program (19PJ1401500), Start-up funding at Fudan University (JIH1322105) and the  
583 Department of Science and Technology of Jilin Province (20190201299JC). The funders had no role in  
584 study design, data collection and analysis, decision to publish, or preparation of the manuscript.

585

#### 586 **Competing Interests**

587 The authors have declared that no competing interests exist.

588

589

590

591

592

593

594

595

596

597 **Supplementary files**

598 **Figure S1.** Per-chromosome phylogenetic trees reconstructed using neighbor-joining algorithm.  
599 Polymorphisms detected on each chromosome were retrieved separately to infer the phylogeny.

600 **Figure S2.** Distribution of nucleotide diversity ( $\pi$ ) at the whole-genome level and the per-chromosome  
601 level. Nucleotide diversity was estimated for each lineage pooling corresponding species, as well as for *A.*  
602 *japonica* and *A. oxysepala*.

603 **Figure S3.** Spearman correlation of the genome-wide nucleotide variation pattern for each 100-kb  
604 sliding window between European and Asian (a), North American and Asian (b), European and North  
605 American (d), *Aquilegia japonica* and *A. oxysepala* (d). Each dot represents a 100-kb sliding window.  
606 Values on the x- and y-axis are the nucleotide diversity ( $\pi$ ) for each sliding window.

607 **Figure S4.** Overlapping of low diversity genomic region (LDGR) between the three lineages. 148 LDGRs  
608 with 5% lowest nucleotide diversity were defined as LDNRs in each lineage, totaling 241 unique regions.

609 **Figure S5.** Pair-wise  $d_N/d_S$  ratio for all genes between the species within and between the Asian,  
610 European and North American lineages.

611 **Figure S6.** PCA illustrates three distinct clusters corresponding to the three lineages. Asian species  
612 further demonstrated higher inter-specific divergence than the American and the European species. PCA  
613 was performed based on 588,659 loci with sufficiently high sequencing quality.

614 **Figure S7.** Illustration of differential methylation in two photosynthesis genes. CG methylation pattern  
615 of two genes, *Aqcoe7G230600* photosystem I *PsaA/PsaB* (a) and *Aqcoe7G231300* *CemA* (b) in *A.*  
616 *japonica* and *A. oxysepala* throughout the gene body region. Red bars indicate methylation level (0-100)  
617 at CG loci. Genomic coordinates on the chromosome 7 are annotated.

618 **Figure S8.** Overlapping of the CCVs (a) and DMGs (b) identified in inter-lineage/species comparisons. A  
619 considerable proportion of these CCVs (84.1%) and DMGs (51.3%) were shared by two or more inter-  
620 lineage/species comparisons.

621 **Figure S9.** Venn analyses of the candidate genes carrying CCVs and DMGs. Each subpanel indicates the  
622 comparison between the *A. japonica* and *A. oxysepala* (a), *A. japonica* and North American (b), *A.*  
623 *japonica* and European (c), *A. oxysepala* and North American (d), *A. oxysepala* and European (e), North  
624 American and European (f).

625

626 **Table S1.** Candidate genomic regions that showed high genetic divergence (top 5% highest  $F_{ST}$ ) between  
627 *Aquilegia japonica* and *A. oxysepala* and low nucleotide diversity (top 5% lowest  $\pi$ ) within each species.

628 **Table S2.** Summary of the highly impactful clade specific variations (CCVs) at both the species and  
629 lineage levels.

630 **Table S3.** Statistics for differentially methylated regions (DMRs) among the four *Aquilegia* lineages or  
631 species. Odds ratio estimates the relative methylation level between two lineages or species being  
632 compared in corresponding region. DMRs were sorted by genomic coordinates with hypo-methylated  
633 DMRs in the first lineage/species preceding hyper-methylated DMRs.

634 **Table S4.** Statistics for differentially methylated genes (DMGs) among the four *Aquilegia* lineages/  
635 species. Only genes harboring a high density of differentially methylated regions (> 2 per kb) were  
636 considered DMGs.

637 **Table S5.** Information of the 36 *Aquilegia* samples used in this study.

638

639

640

641

642

643

644

645

646

647

648

649

650

651

652

653  
654  
655  
656  
657  
658  
659  
660  
661  
662  
663  
664  
665  
666  
667  
668  
669  
670  
671  
672  
673  
674  
675  
676  
677  
678  
679  
680  
681  
682  
683  
684

## References

1. Givnish, T. J. Adaptive radiation versus ‘radiation’ and ‘explosive diversification’: Why conceptual distinctions are fundamental to understanding evolution. *New Phytologist* **207**, 297–303 (2015).
2. Schluter, D. The Ecology of Adaptive Radiation. *Heredity* **86**, 749–750 (2001).
3. Schluter, D. Ecological causes of adaptive radiation. *American Naturalist* **148**, (1996).
4. Givnish TJ. Adaptive radiation and molecular systematics: aims and conceptual issues. *Molecular Evolution and Adaptive Radiation*. 1997:1-54.
5. Simpson GG, Olson EC. The major features of evolution. *Quarterly Review of Biology*.1953;8(1):87-8.
6. Losos, J. B. Adaptive Radiation, Ecological Opportunity, and Evolutionary Determinism. *American Naturalists*. **175**, 623–639 (2010).
7. Irisarri, I. *et al.* Phylogenomics uncovers early hybridization and adaptive loci shaping the radiation of Lake Tanganyika cichlid fishes. *Nature Communications* **9**, (2018).
8. Lamichhaney, S. *et al.* Evolution of Darwin’s finches and their beaks revealed by genome sequencing. *Nature* **518**, 371–375 (2015).
9. Losos, J. B. & Ricklefs, R. E. Adaptation and diversification on islands. *Nature* **457**, 830–836 (2009).
10. Motley, T. J. Tarweeds & Silverswords, Evolution of the Madiinae (Asteraceae). *Economic Botany* **58**, 123–124 (2004).
11. Wagner, C. E., Harmon, L. J. & Seehausen, O. Ecological opportunity and sexual selection together predict adaptive radiation. *Nature* **487**, 366–369 (2012).
12. Simpson, E. H. Measurement of diversity. *Nature* **163**, 688 (1949).
13. Berner, D. & Salzburger, W. The genomics of organismal diversification illuminated by adaptive radiations. *Trends in Genetics* **31**, 491–499 (2015).
14. Brawand, D. *et al.* The genomic substrate for adaptive radiation in African cichlid fish. *Nature* **513**, 375–381 (2015).

- 685 15. Ford, A. G. P. *et al.* Niche divergence facilitated by fine-scale ecological partitioning in a recent  
686 cichlid fish adaptive radiation. *Evolution* **70**, 2718–2735 (2016).
- 687 16. Filiault, D. L. *et al.* The *Aquilegia* genome provides insight into adaptive radiation and reveals an  
688 extraordinarily polymorphic chromosome with a unique history. *Elife* **7**, (2018).
- 689 17. Fior, S. *et al.* Spatiotemporal reconstruction of the *Aquilegia* rapid radiation through next-  
690 generation sequencing of rapidly evolving cpDNA regions. *New Phytologist* **198**, 579–592 (2013).
- 691 18. *Aquilegia*; M. the cultivated and wild columbines. *Gentes Herbarum* **7**, 1–150 (1946).
- 692 19. Bastida, J. M., Alcántara, J. M., Rey, P. J., Vargas, P. & Herrera, C. M. Extended phylogeny of  
693 *Aquilegia*: The biogeographical and ecological patterns of two simultaneous but contrasting radiations.  
694 *Plant Systematics and Evolution* **284**, 171–185 (2010).
- 695 20. Sharma, B., Yant, L., Hodges, S. A. & Kramer, E. M. Understanding the development and evolution of  
696 novel floral form in *Aquilegia*. *Current Opinion in Plant Biology* **17**, 22–27 (2014).
- 697 21. Kramer, E. M. & Hodges, S. A. *Aquilegia* as a model system for the evolution and ecology of petals.  
698 *Philosophical Transactions of the Royal Society B: Biological Sciences* **365**, 477–490 (2010).
- 699 22. Alcántara, J. M., Bastida, J. M. & Rey, P. J. Linking divergent selection on vegetative traits to  
700 environmental variation and phenotypic diversification in the Iberian columbines (*Aquilegia*). *Journal of*  
701 *Evolutionary Biology* **23**, 1218–1233 (2010).
- 702 23. Whittall, J. B. & Hodges, S. A. Pollinator shifts drive increasingly long nectar spurs in columbine  
703 flowers. *Nature* **447**, 706–709 (2007).
- 704 24. Garrido, J. L. *et al.* Geographic genetic structure of Iberian columbines (gen. *Aquilegia*). *Plant*  
705 *Systematics and Evolution* **303**, 1145–1160 (2017).
- 706 25. Li, L. F. *et al.* Phenotypic and genetic evidence for ecological speciation of *aquilegia japonica* and *A.*  
707 *oxysepala*. *New Phytologist*. **204**, 1028–1040 (2014).
- 708 26. Tang, L. L., Yu, Q., Sun, J. F. & Huang, S. Q. Floral traits and isolation of three sympatric *Aquilegia*  
709 species in the Qinling Mountains, China. *Plant Systematics Evolution* **267**, 121–128 (2007).
- 710 27. Zhang, H. & Dawe, R. K. Mechanisms of plant spindle formation. *Chromosome Research* **19**, 335–344  
711 (2011).
- 712 28. Aguirre-Portolés, C. *et al.* Tpx2 controls spindle integrity, genome stability, and tumor development.  
713 *Cancer Research* **72**, 1518–1528 (2012).
- 714 29. Fukui, K. *et al.* Crystal structure of Muts2 endonuclease domain and the mechanism of homologous  
715 recombination suppression. *Journal of Biological Chemistry* **283**, 33417–33427 (2008).

- 716 30. Li, M. R. *et al.* Rapid Divergence Followed by Adaptation to Contrasting Ecological Niches of Two  
717 Closely Related Columbine Species *Aquilegia japonica* and *A. oxysepala*. *Genome Biology Evolution* **11**,  
718 919–930 (2019).
- 719 31. Machado-Schiaffino, G., Henning, F. & Meyer, A. Species-specific differences in adaptive phenotypic  
720 plasticity in an ecologically relevant trophic trait: Hypertrophic lips in midas cichlid fishes. *Evolution* **68**,  
721 2086–2091 (2014).
- 722 32. Verhoeven, K. J. F., VonHoldt, B. M. & Sork, V. L. Epigenetics in ecology and evolution: What we  
723 know and what we need to know. *Molecular Ecology* **25**, 1631–1638 (2016).
- 724 33. Diez, C. M., Roessler, K. & Gaut, B. S. Epigenetics and plant genome evolution. *Current Opinion in*  
725 *Plant Biology* **18**, 1–8 (2014).
- 726 34. Bossdorf, O., Richards, C. L. & Pigliucci, M. Epigenetics for ecologists. *Ecology Letters* **11**, 106–115  
727 (2008).
- 728 35. Richards, C. L. *et al.* Ecological plant epigenetics: Evidence from model and non-model species, and  
729 the way forward. *Ecology Letters* **20**, 1576–1590 (2017).
- 730 36. Richards, C. L., Bossdorf, O. & Verhoeven, K. J. F. Understanding natural epigenetic variation. *New*  
731 *Phytologist* **187**, 562–564 (2010).
- 732 37. Cortijo, S. *et al.* Mapping the epigenetic basis of complex traits. *Science* **343**, 1145–1148 (2014).
- 733 38. Schmitz, R. J. *et al.* Transgenerational epigenetic instability is a source of novel methylation variants.  
734 *Science* **334**, 369–373 (2011).
- 735 39. Becker, C. *et al.* Spontaneous epigenetic variation in the *Arabidopsis thaliana* methylome. *Nature*  
736 **480**, 245–249 (2011).
- 737 40. Li, L., Wang, C., Lu, T., Lin, S. & Hu, Y.-Q. Indirect effect inference and application to GAW20 data.  
738 *BMC Genetics* **19**, (2018).
- 739 41. Fisher, V. A. *et al.* Do changes in DNA methylation mediate or interact with SNP variation? A  
740 pharmacoepigenetic analysis. *BMC Genetics* **19**, (2018).
- 741 42. Zilberman, D. An evolutionary case for functional gene body methylation in plants and animals.  
742 *Genome Biology* **18**, (2017).
- 743 43. Bewick, A. J. *et al.* On the origin and evolutionary consequences of gene body DNA methylation.  
744 *Proceedings of the National Academy of Sciences of the United States of America* **113**, 9111–9116  
745 (2016).

- 746 44. Takuno, S. & Gaut, B. S. Gene body methylation is conserved between plant orthologs and is of  
747 evolutionary consequence. *Proceedings of the National Academy of Sciences of the United States of*  
748 *America* **110**, 1797–1802 (2013).
- 749 45. Bewick, A. J. & Schmitz, R. J. Gene body DNA methylation in plants. *Current Opinion in Plant Biology*  
750 **36**, 103–110 (2017).
- 751 46. Li, L. F., Pang, D., Liao, Q. L. & Xiao, H. X. Genomic and EST microsatellite markers for *Aquilegia*  
752 *flabellata* and cross-amplification in *A. oxysepala* (Ranunculaceae). *American Journal of Botany* **98**,  
753 (2011).
- 754 47. Li, H. & Durbin, R. Fast and accurate short read alignment with Burrows-Wheeler transform.  
755 *Bioinformatics* **25**, 1754–1760 (2009).
- 756 48. McKenna, A. *et al.* The genome analysis toolkit: A MapReduce framework for analyzing next-  
757 generation DNA sequencing data. *Genome Research* **20**, 1297–1303 (2010).
- 758 49. Li, H. *et al.* The Sequence Alignment/Map format and SAMtools. *Bioinformatics* **25**, 2078–2079  
759 (2009).
- 760 50. Cingolani, P. *et al.* A program for annotating and predicting the effects of single nucleotide  
761 polymorphisms, SnpEff. *Fly (Austin)*. **6**, 80–92 (2012).
- 762 51. Kumar, S., Stecher, G. & Tamura, K. MEGA7: Molecular Evolutionary Genetics Analysis Version 7.0  
763 for Bigger Datasets. *Molecular Biology and Evolution* **33**, 1870–1874 (2016).
- 764 52. Zheng, X. *et al.* A high-performance computing toolset for relatedness and principal component  
765 analysis of SNP data. *Bioinformatics* **28**, 3326–3328 (2012).
- 766 53. Alexander, D. H., Novembre, J. & Lange, K. Fast model-based estimation of ancestry in unrelated  
767 individuals. *Genome Research* **19**, 1655–1664 (2009).
- 768 54. Weir, B. S. & Cockerham, C. C. Estimating F-statistics for the analysis of population structure.  
769 *Evolution* **38**, 1358–1370 (1984).
- 770 55. Danecek, P. *et al.* The variant call format and VCFtools. *Bioinformatics* **27**, 2156–2158 (2011).
- 771 56. Yang, Z. PAML 4: Phylogenetic analysis by maximum likelihood. *Molecular Biology and Evolution* **24**,  
772 1586–1591 (2007).
- 773 57. Krueger, F. & Andrews, S. R. Bismark: A flexible aligner and methylation caller for Bisulfite-Seq  
774 applications. *Bioinformatics* **27**, 1571–1572 (2011).
- 775 58. O’Sullivan, D. E., Johnson, K. C., Skinner, L., Koestler, D. C. & Christensen, B. C. Epigenetic and  
776 genetic burden measures are associated with tumor characteristics in invasive breast carcinoma.  
777 *Epigenetics* **11**, 344–353 (2016).



- 778 59. Thorvaldsdóttir, H., Robinson, J. T. & Mesirov, J. P. Integrative Genomics Viewer (IGV): High-  
779 performance genomics data visualization and exploration. *Brief Bioinformatics* **14**, 178–192 (2013).
- 780 60. Rice, P., Longden, L. & Bleasby, A. EMBOSS: The European Molecular Biology Open Software Suite.  
781 *Trends in Genetics* **16**, 276–277 (2000).
- 782 61. Price, A. L. *et al.* Principal components analysis corrects for stratification in genome-wide association  
783 studies. *Nature Genetics* **38**, 904–909 (2006).
- 784 62. Alexa, A., Rahnenführer, J. & Lengauer, T. Improved scoring of functional groups from gene  
785 expression data by decorrelating GO graph structure. *Bioinformatics* **22**, 1600–1607 (2006).
- 786 63. Bardou, P., Mariette, J., Escudié, F., Djemiel, C. & Klopp, C. Jvenn: An interactive Venn diagram  
787 viewer. *BMC Bioinformatics* **15**, (2014).
- 788

(a)

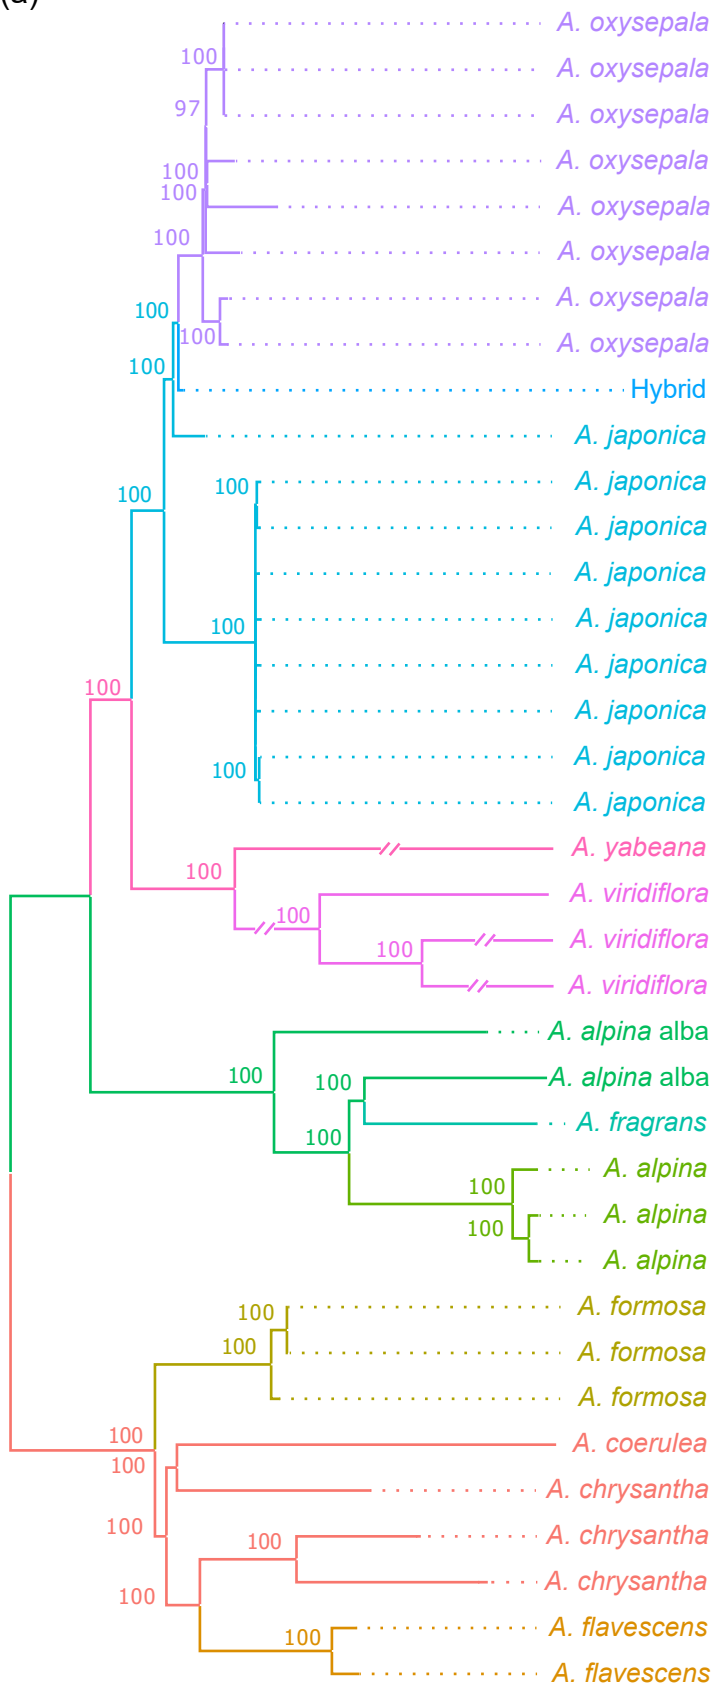

(b)

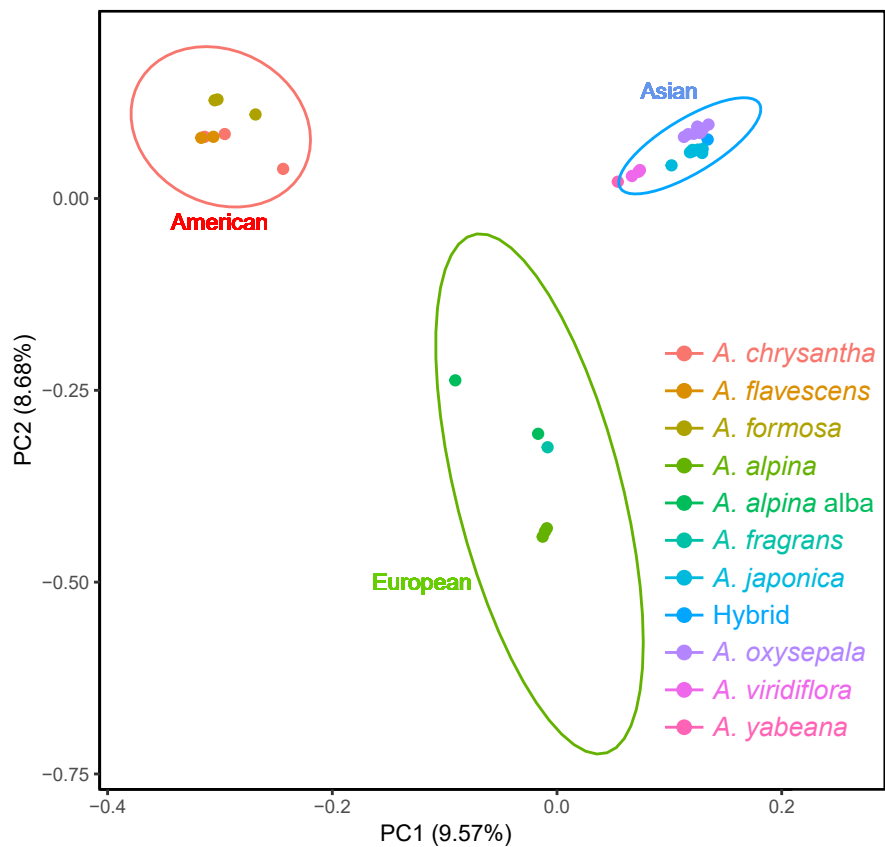

(c)

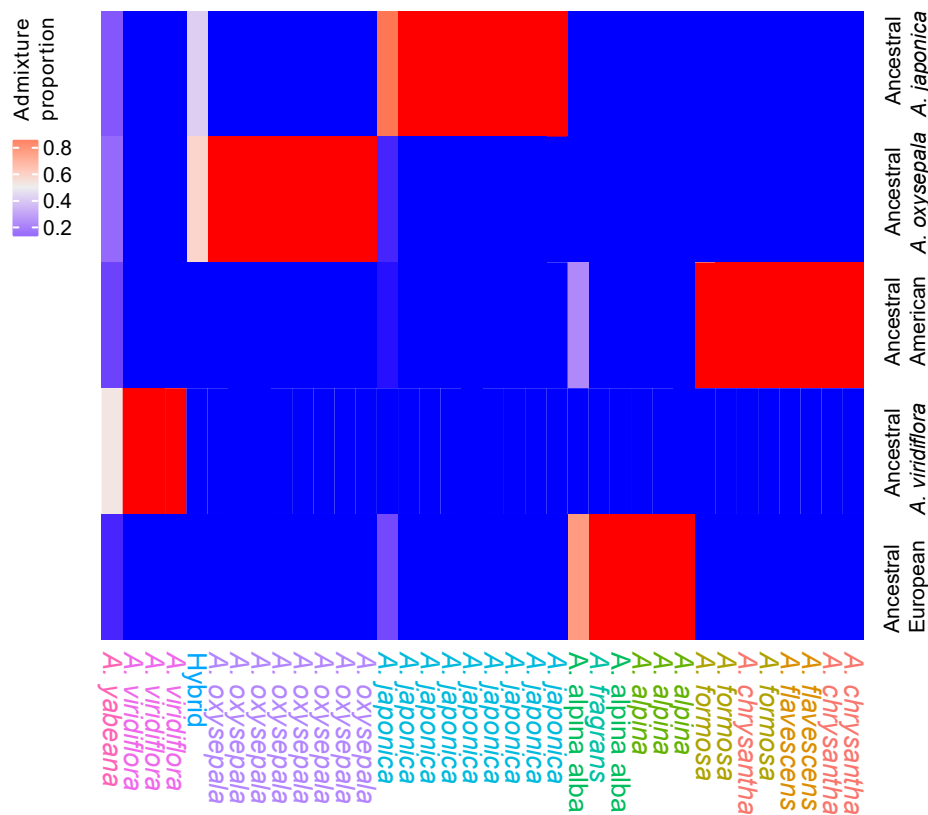

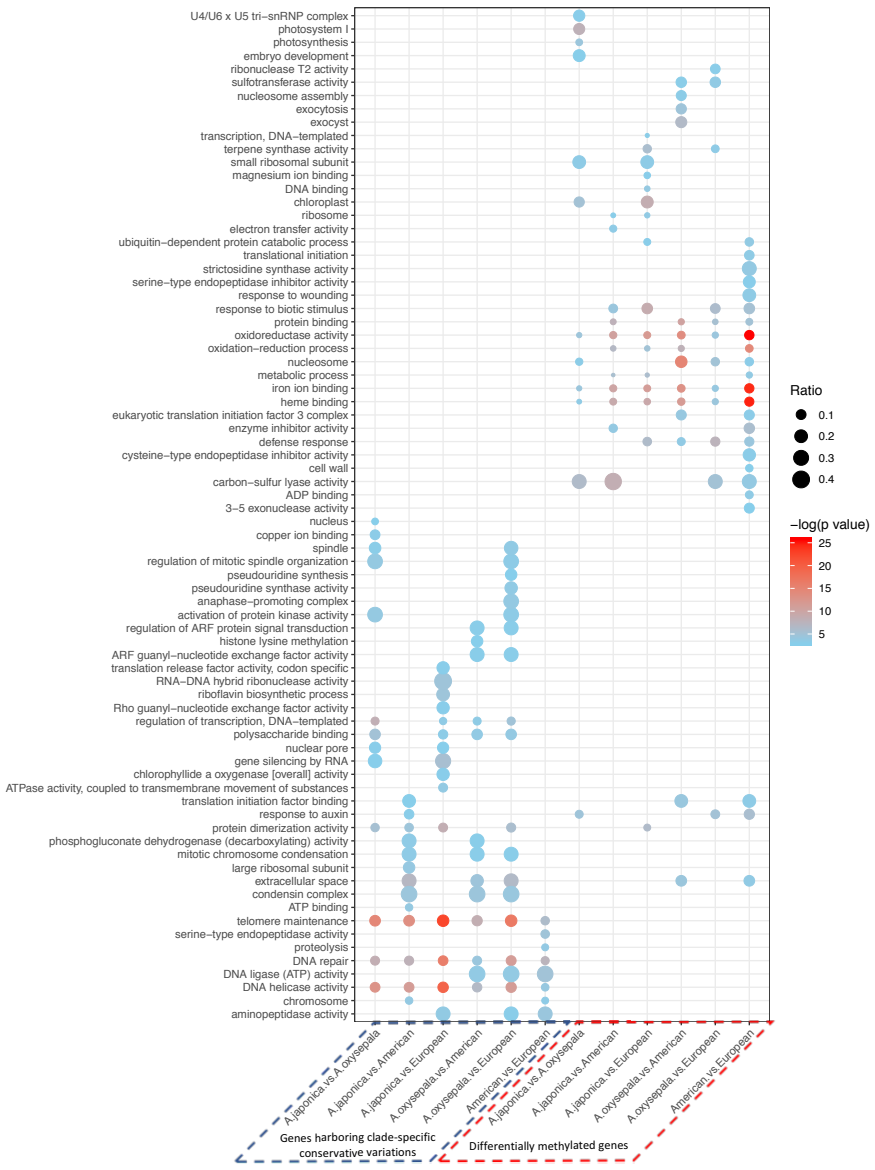



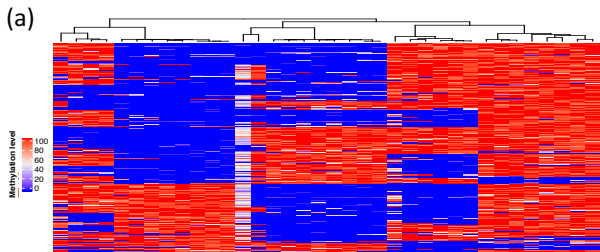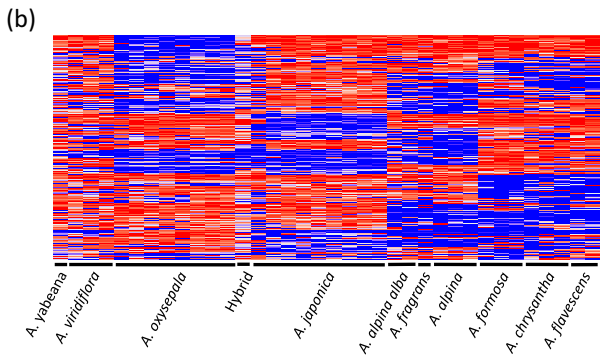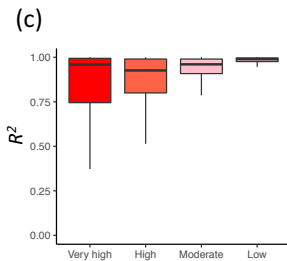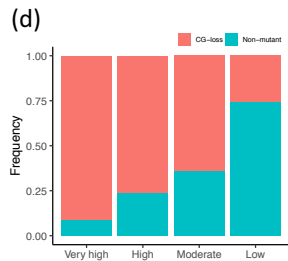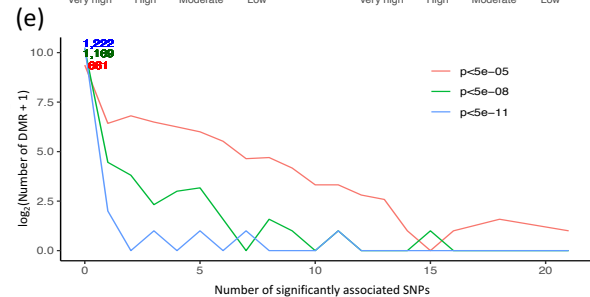

### Chr1

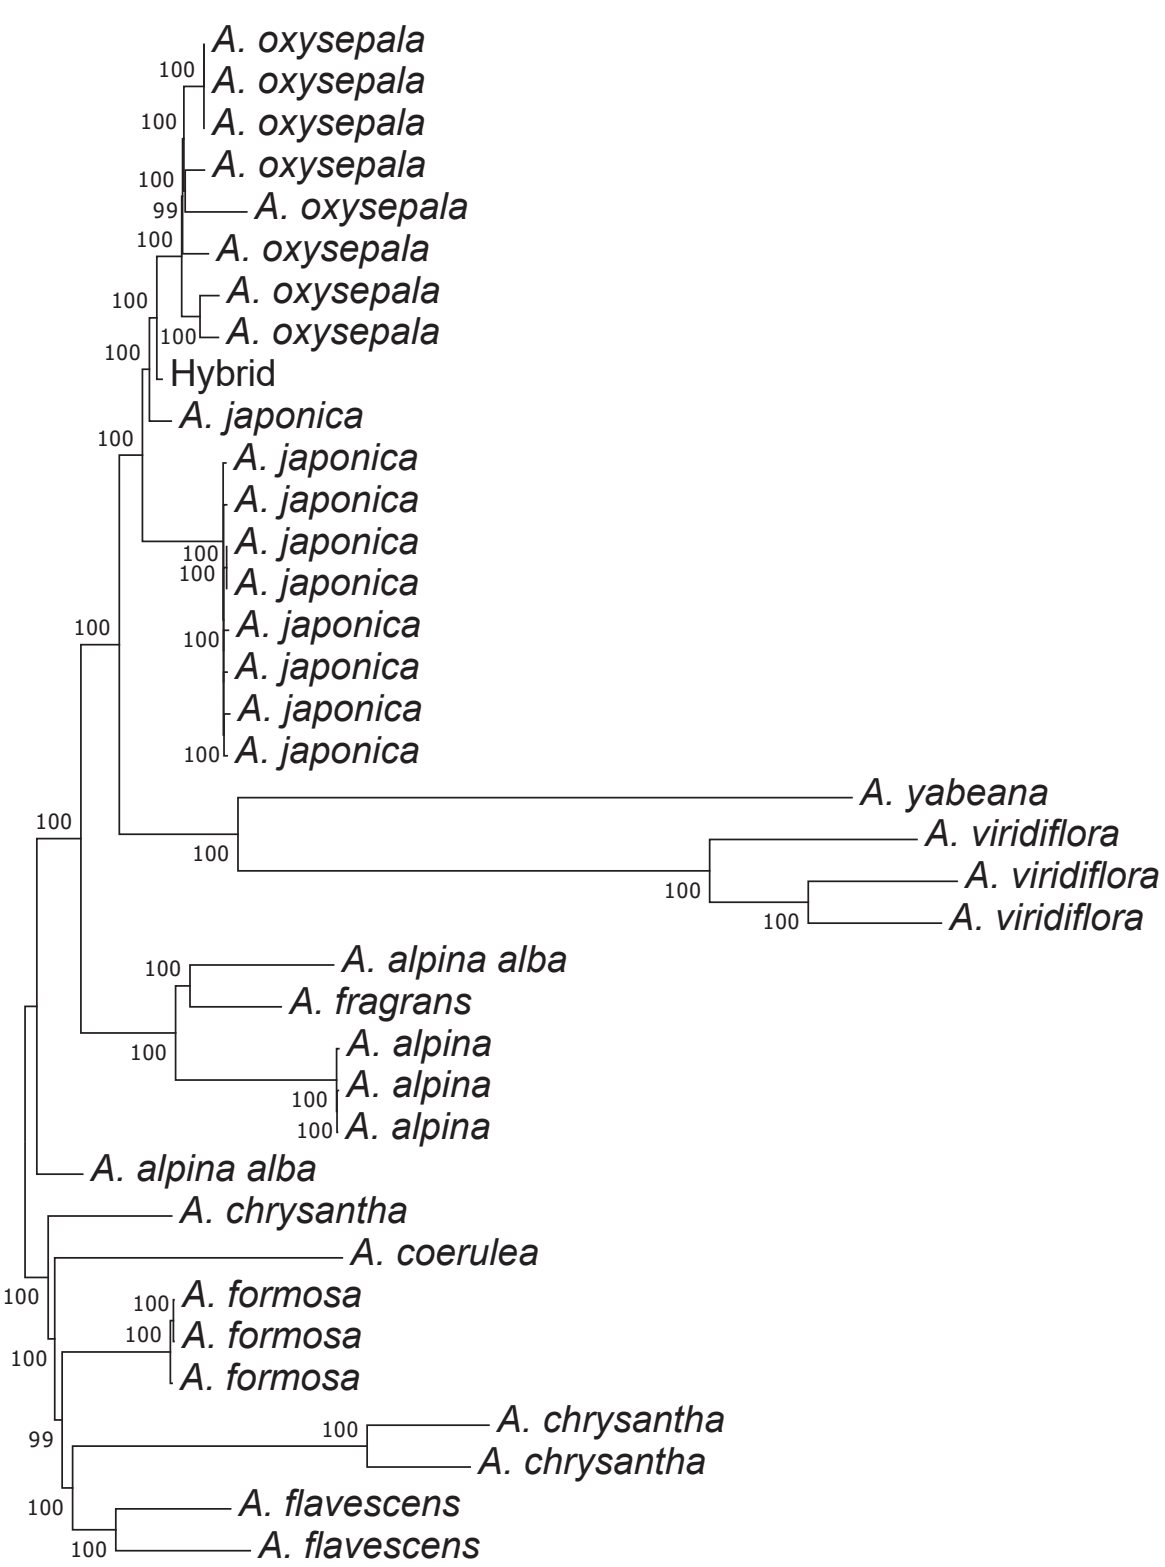

0.020

### Chr2

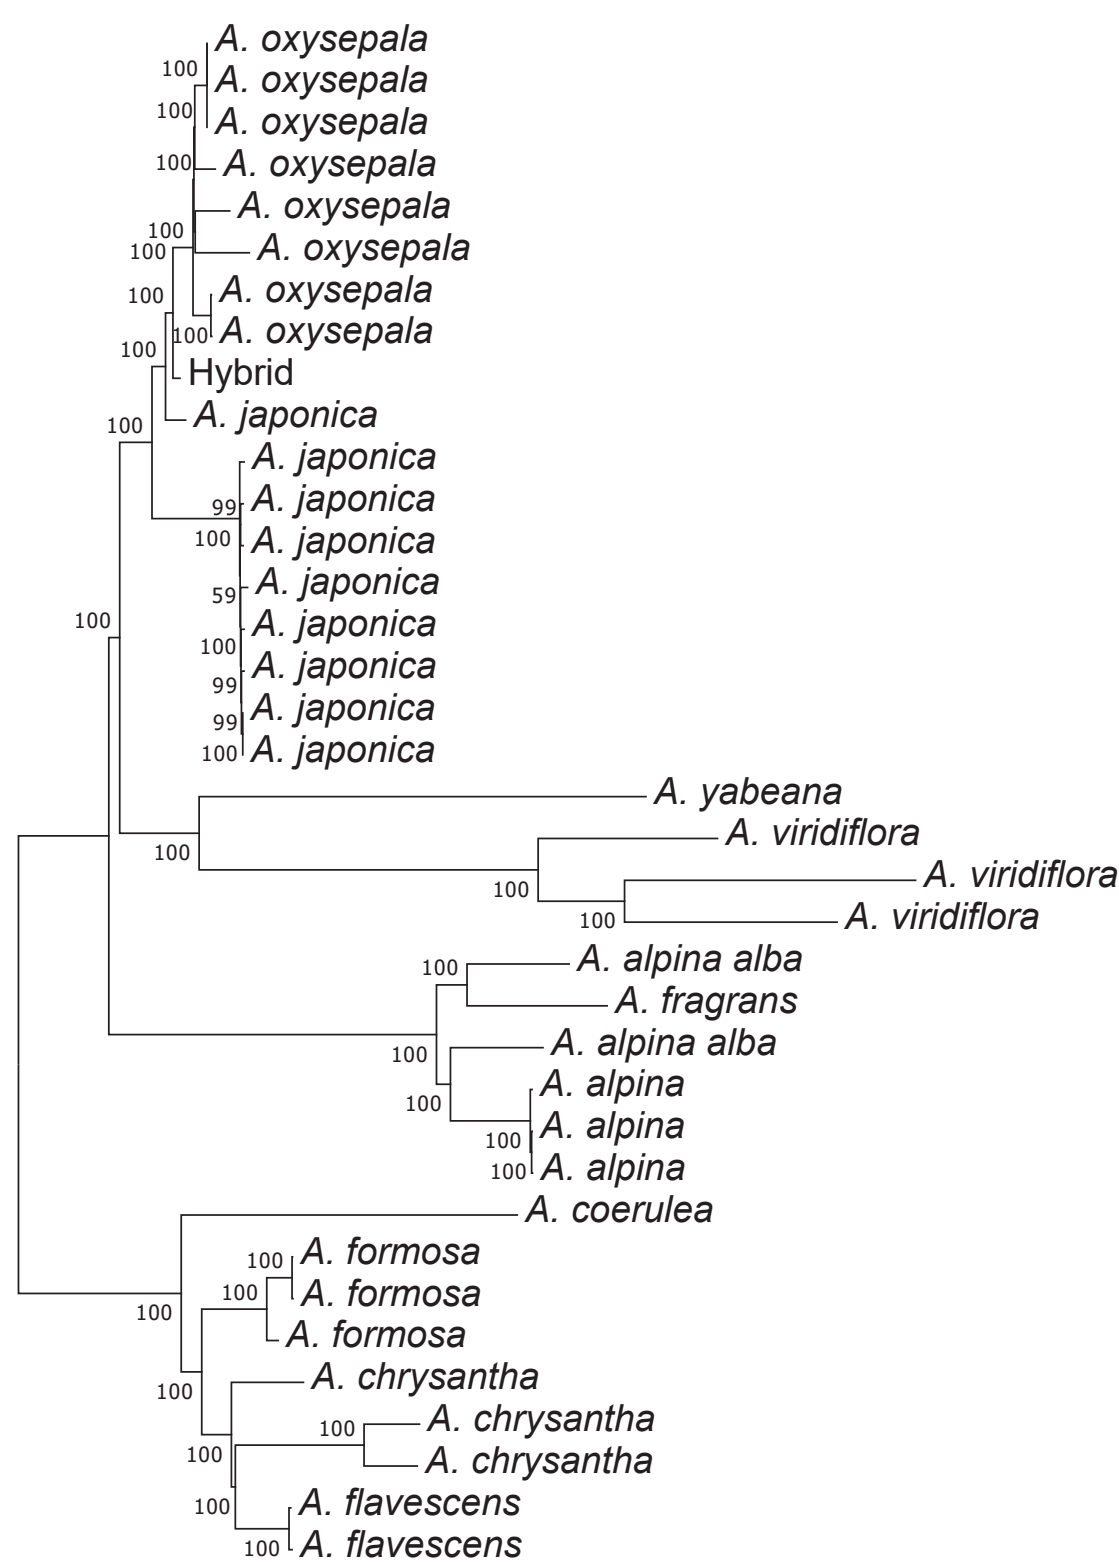

0.020

### Chr3

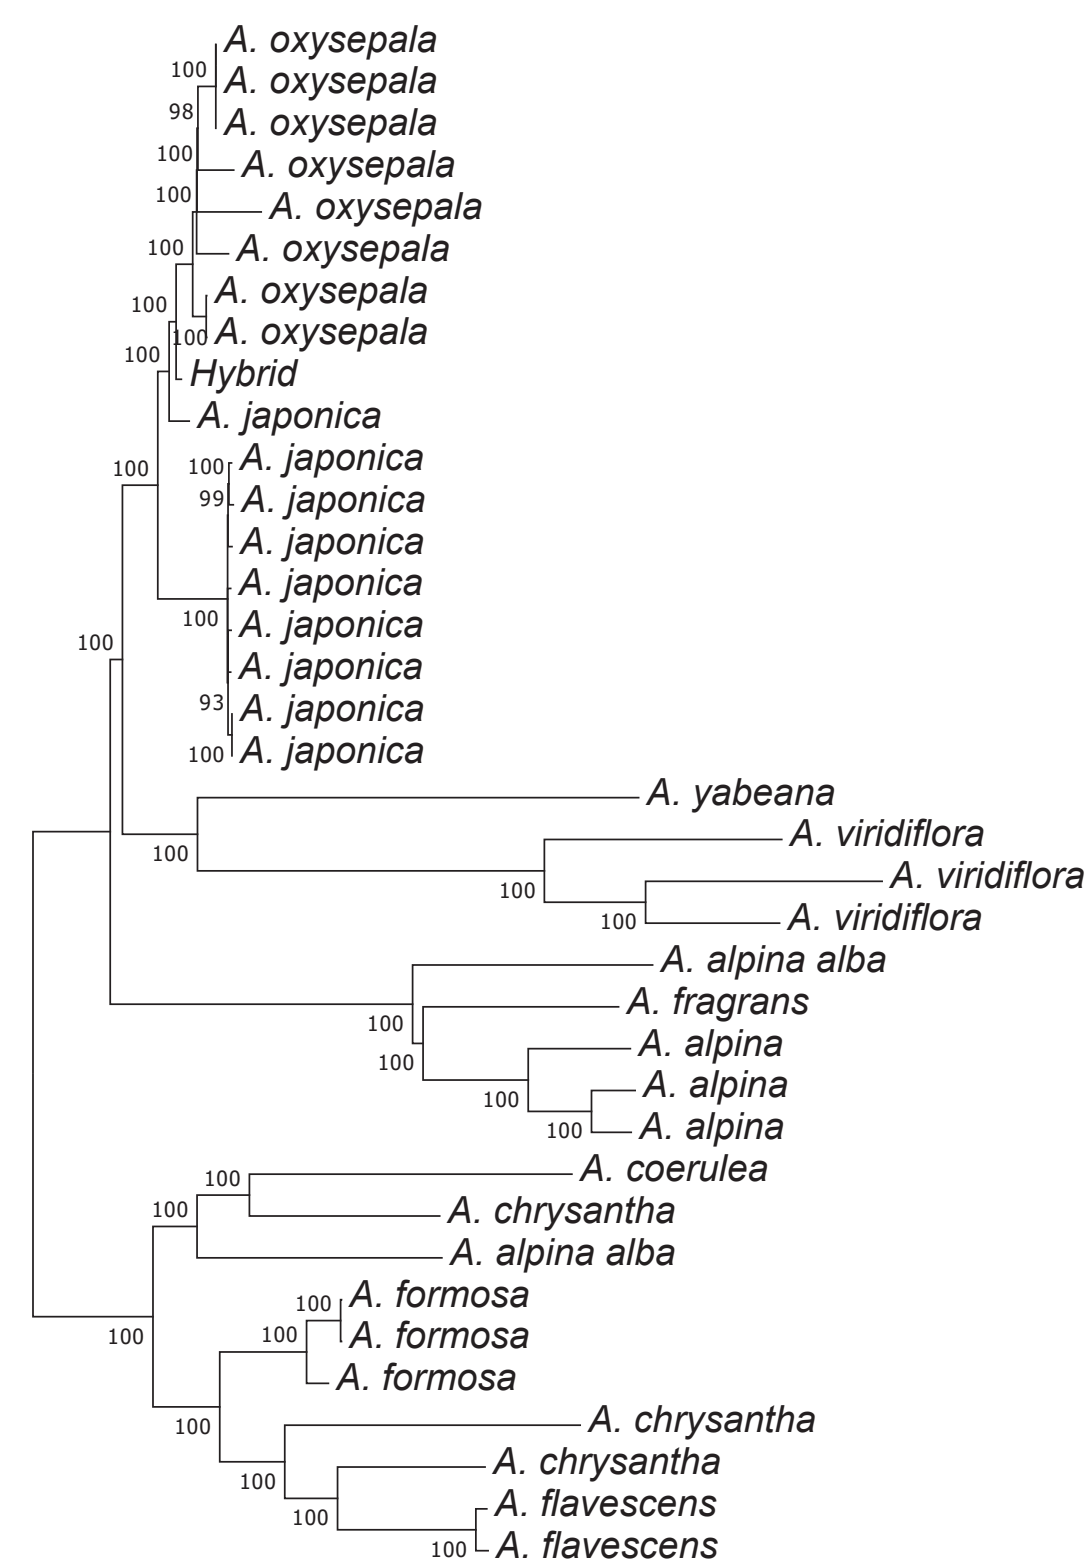

0.020

### Chr4

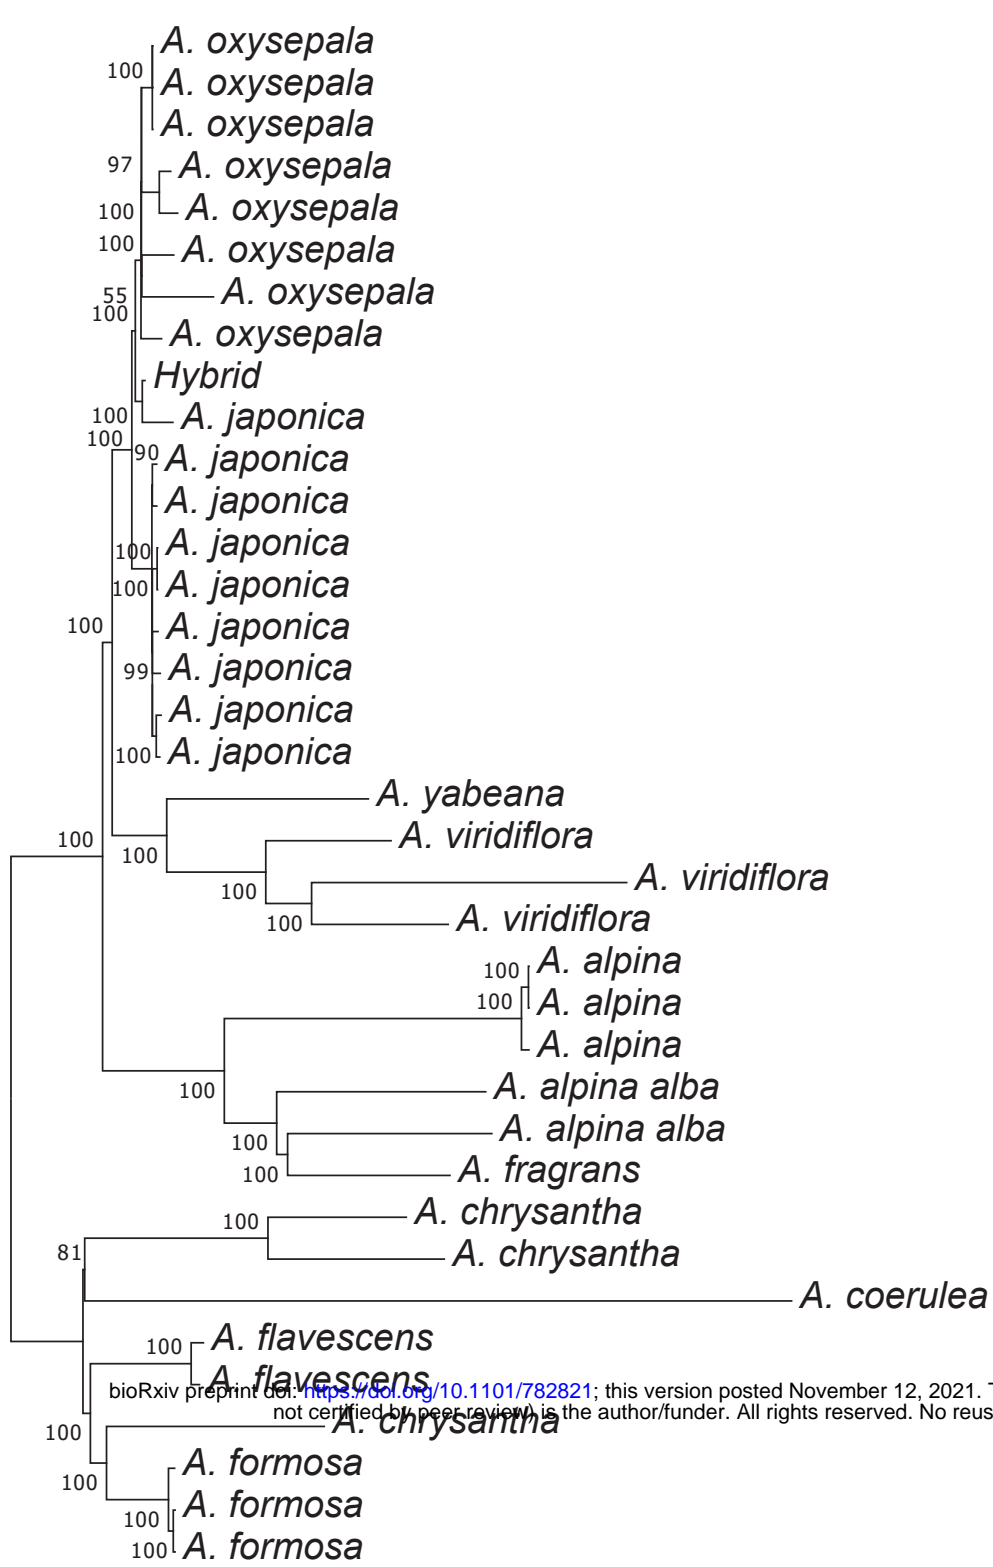

0.020

### Chr5

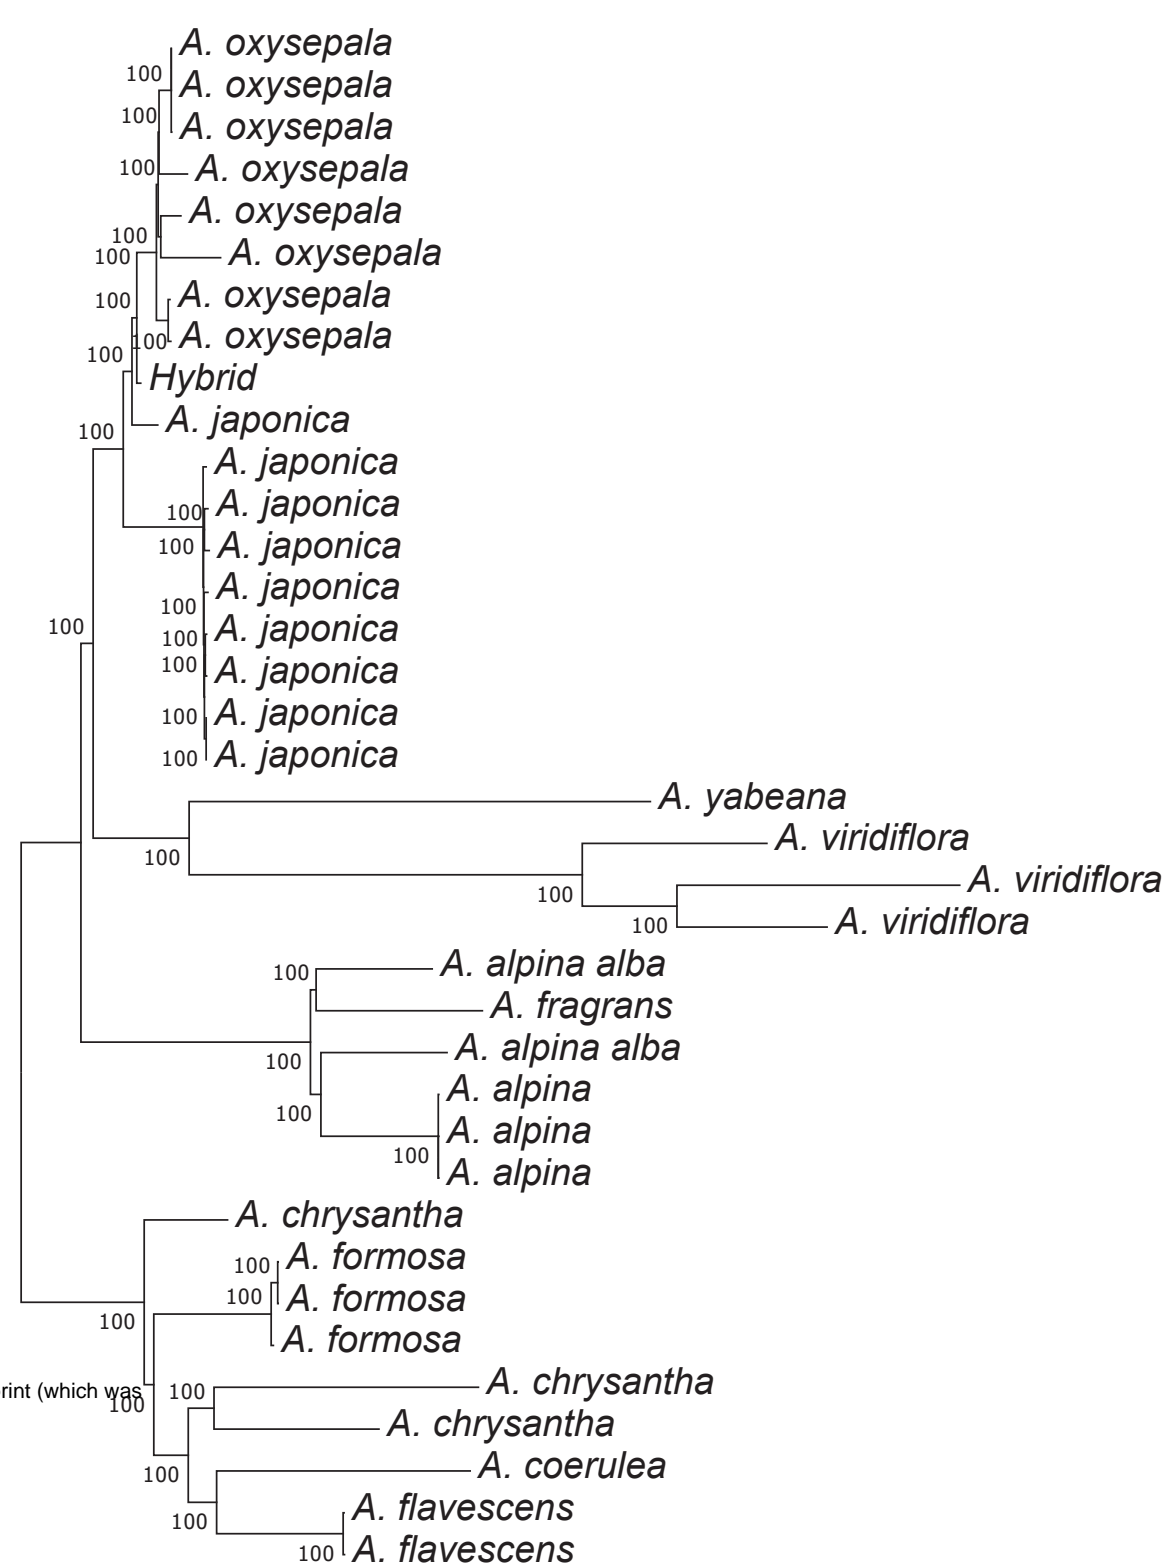

0.020

### Chr6

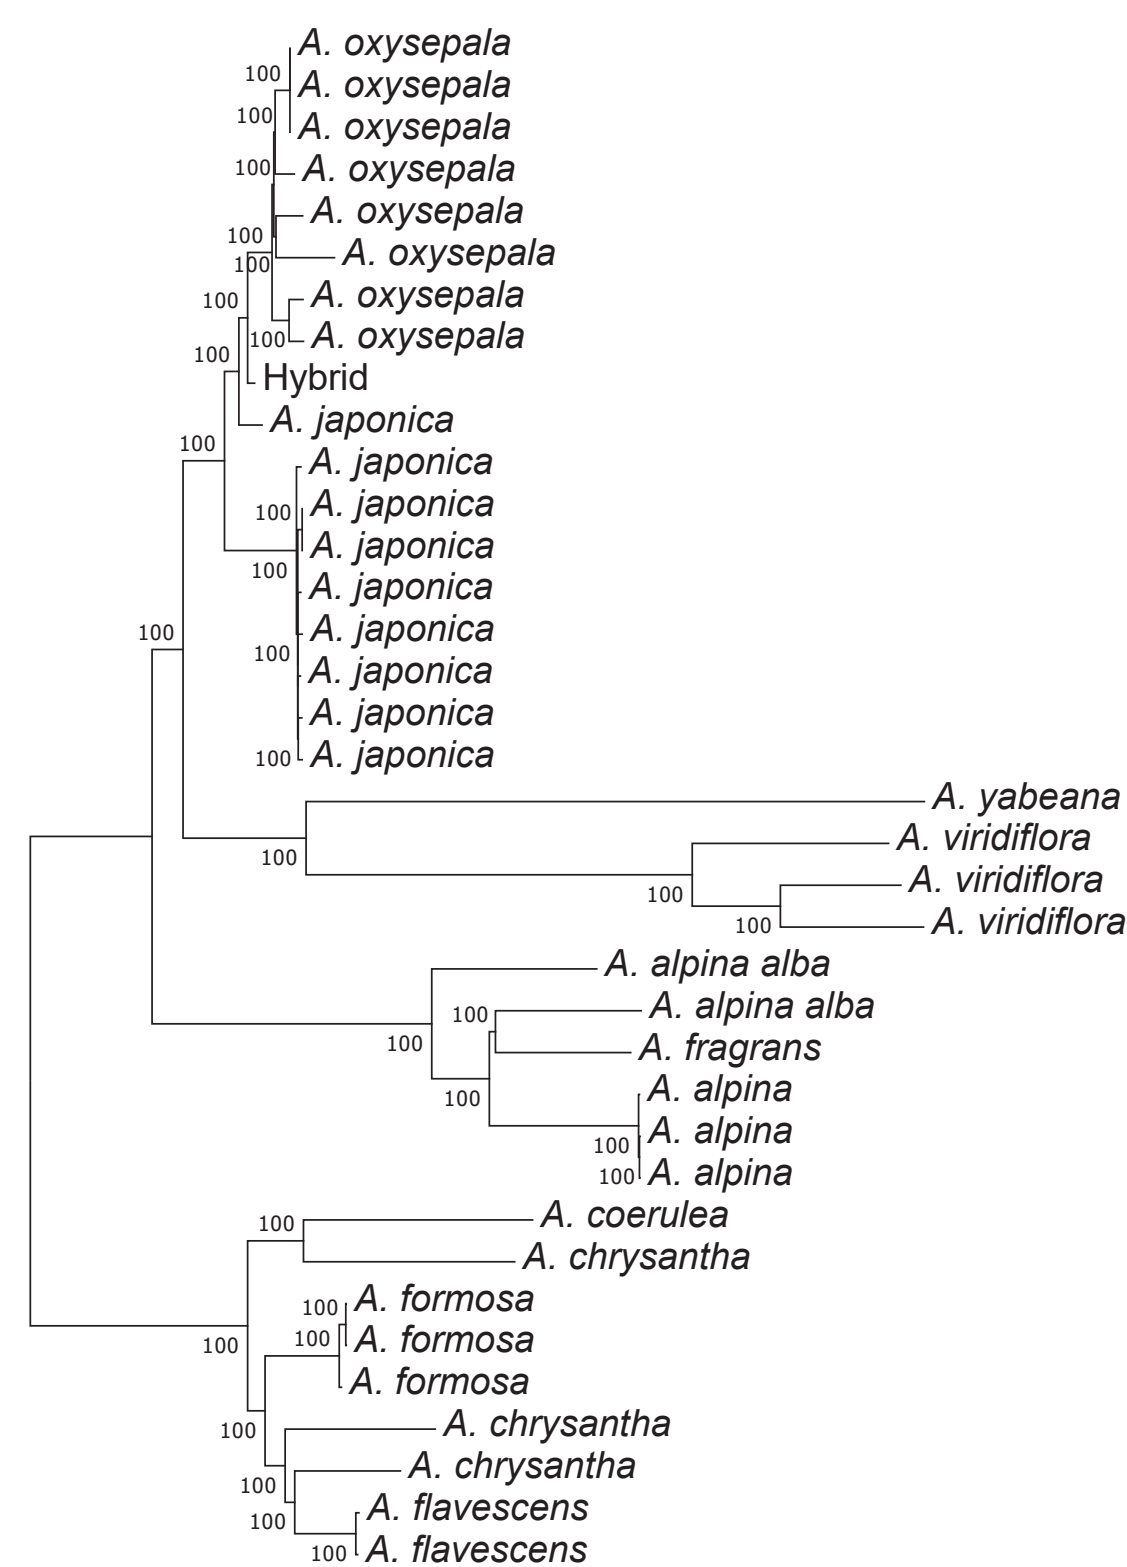

0.020

### Chr7

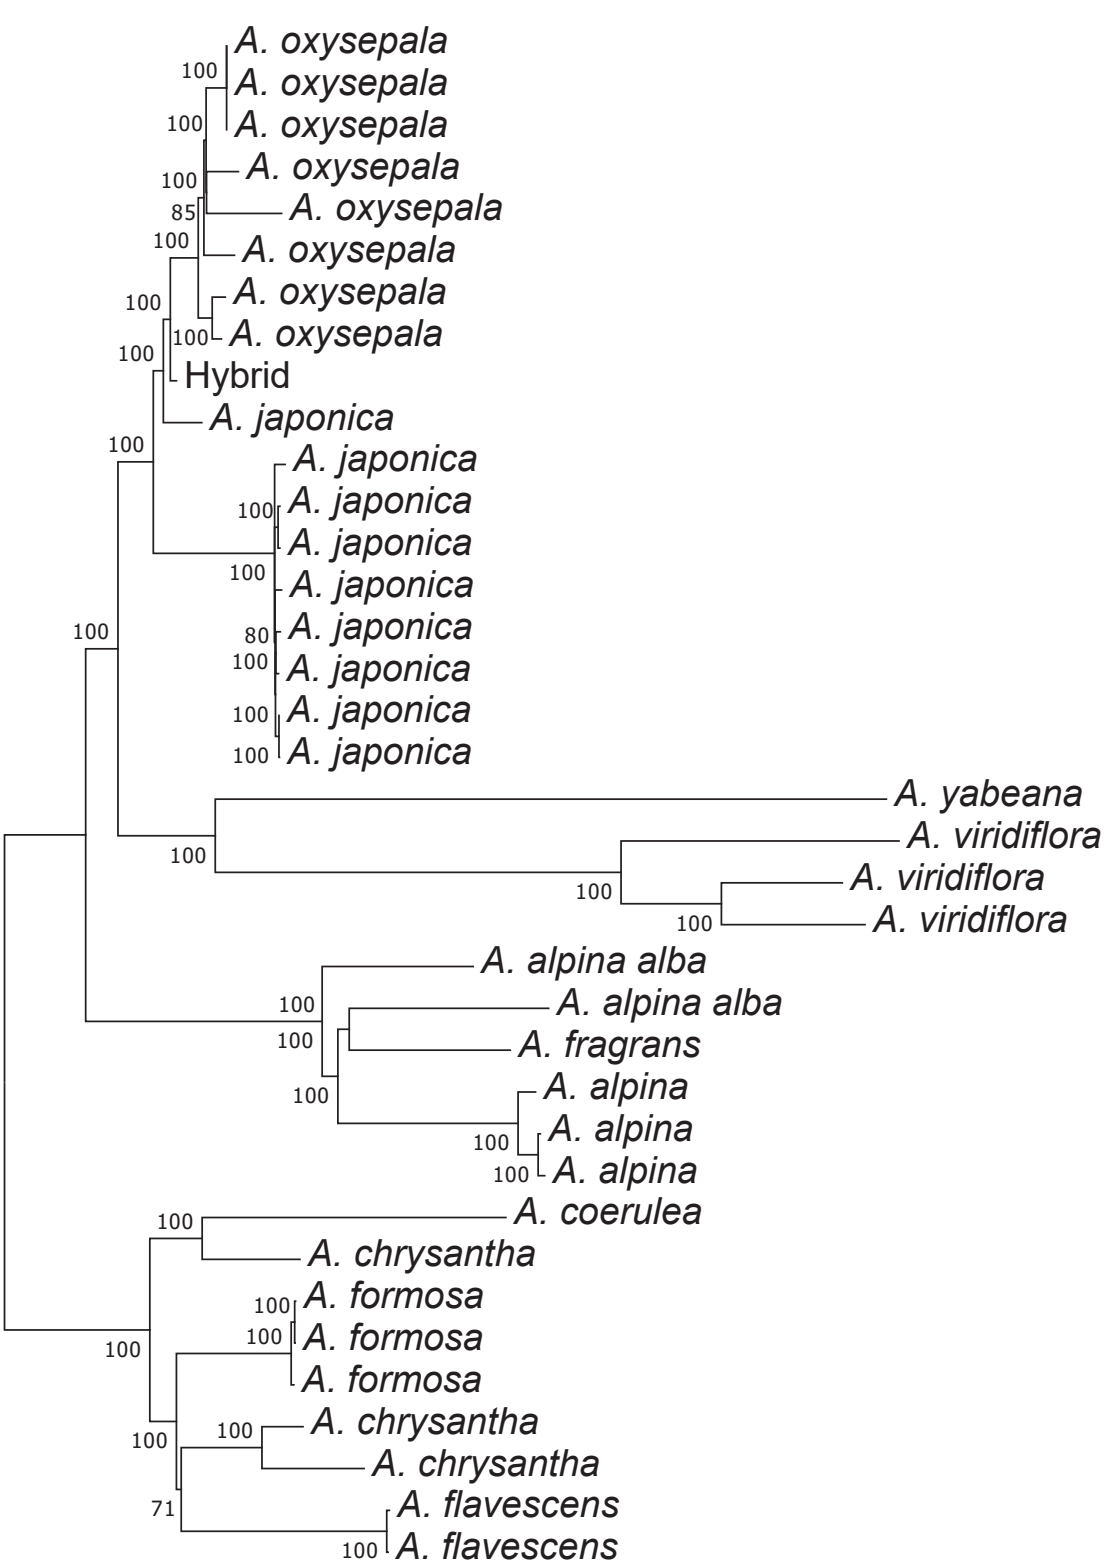

0.020

### All

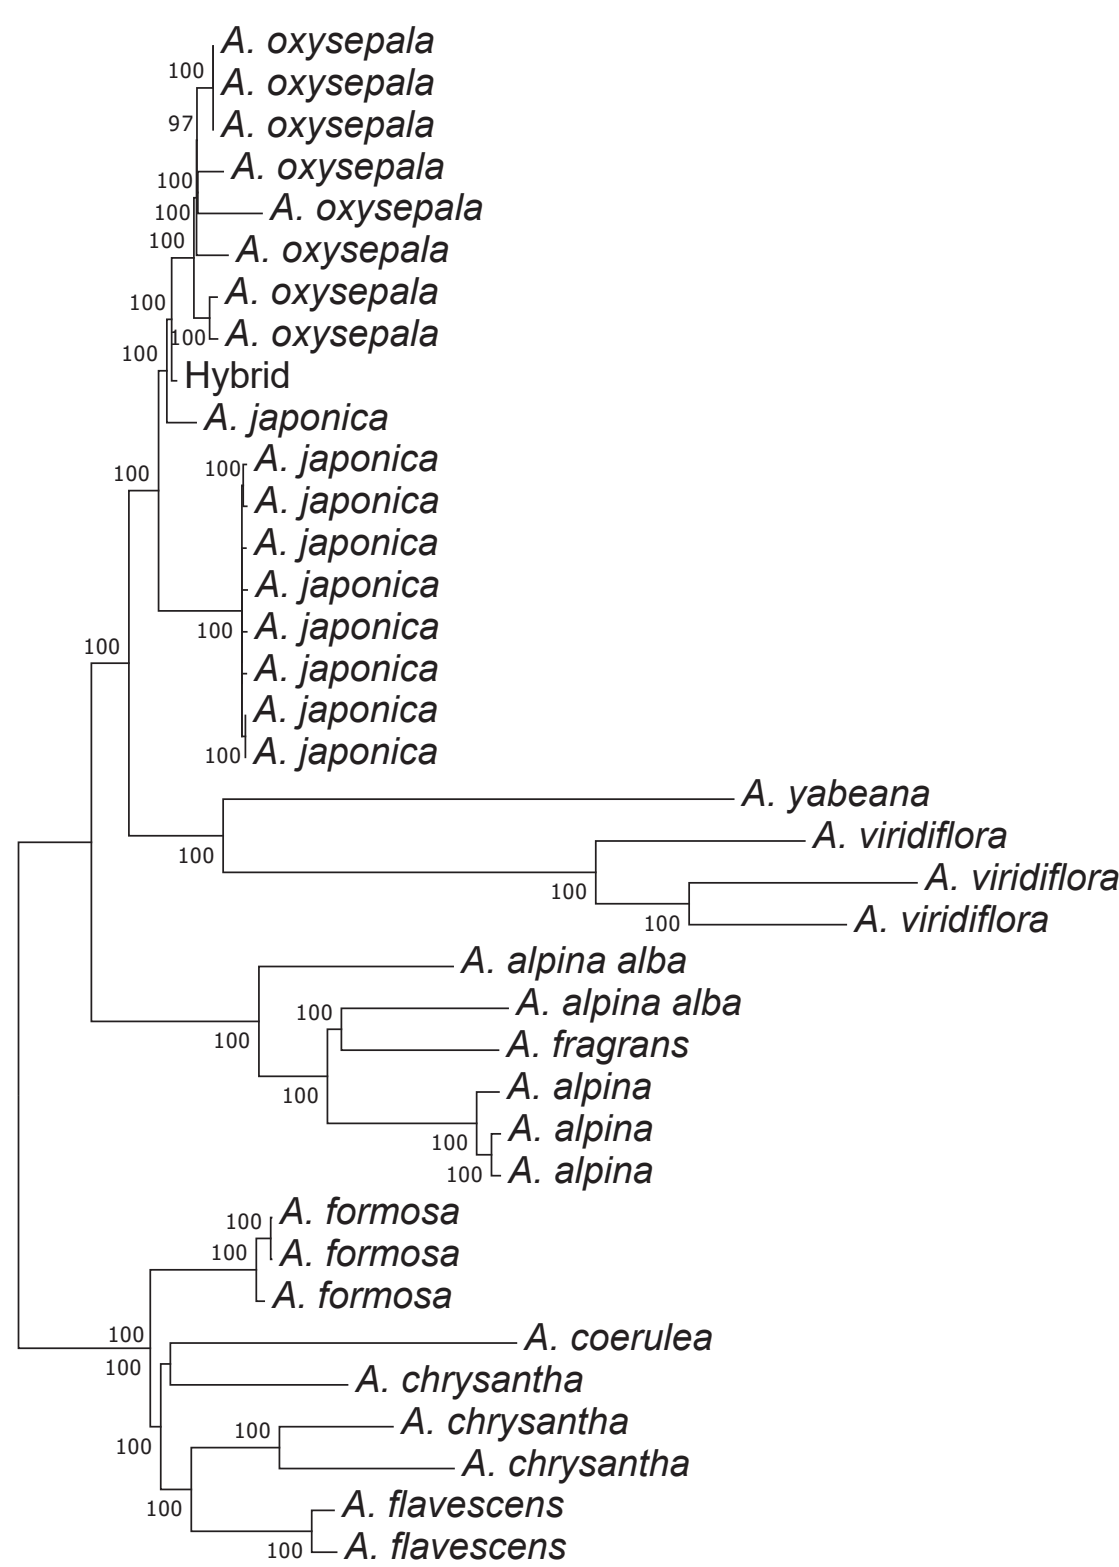

0.020

bioRxiv preprint doi: <https://doi.org/10.1101/782821>; this version posted November 12, 2021. The copyright holder for this preprint (which was not certified by peer review) is the author/funder. All rights reserved. No reuse allowed without permission.

Whole genome

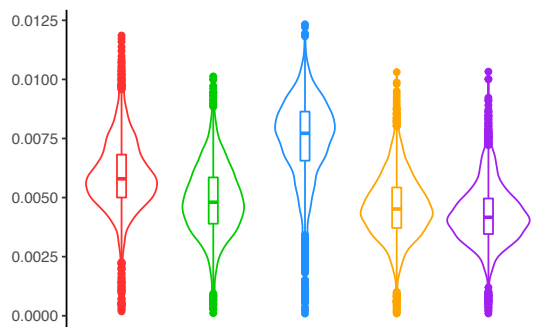

Chr1

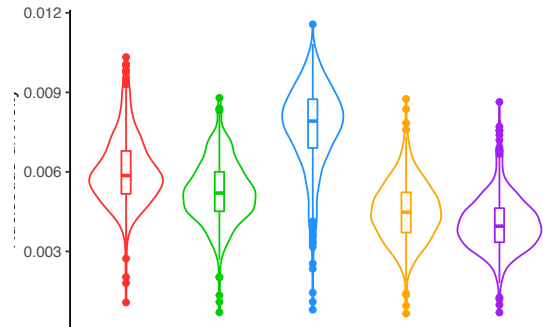

Chr2

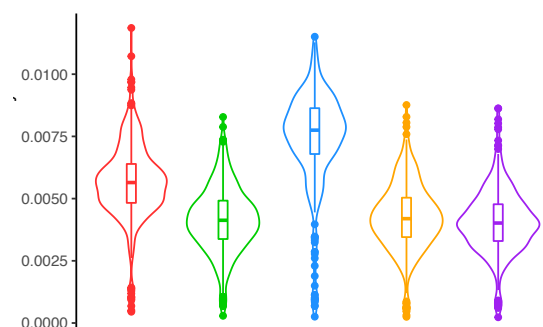

Chr3

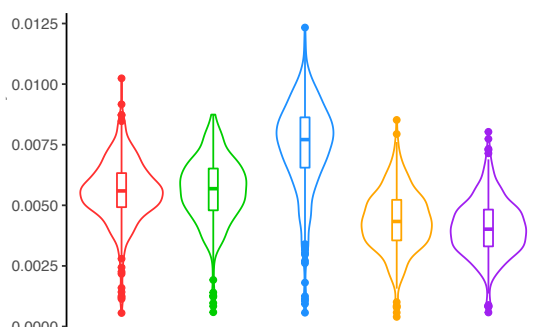

Chr4

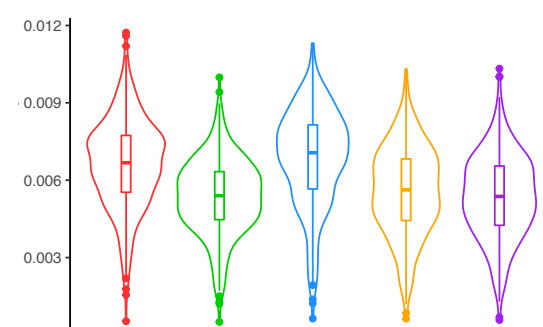

Chr5

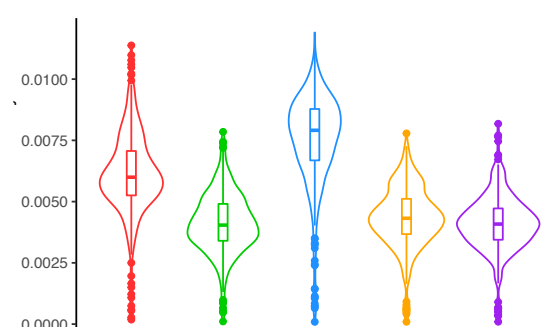

Chr6

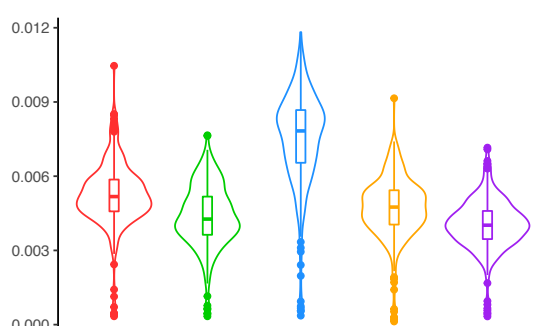

Chr7

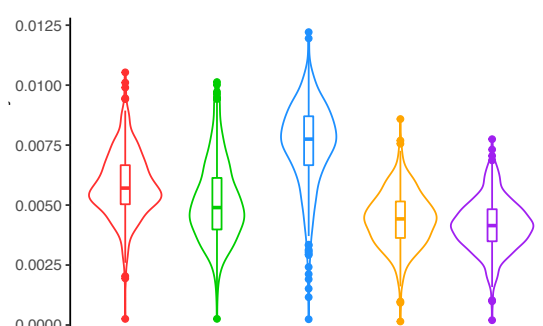

Nucleotide diversity

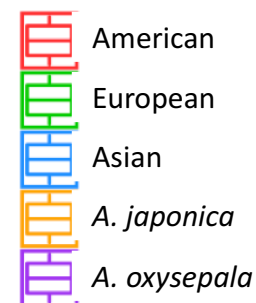



(a)

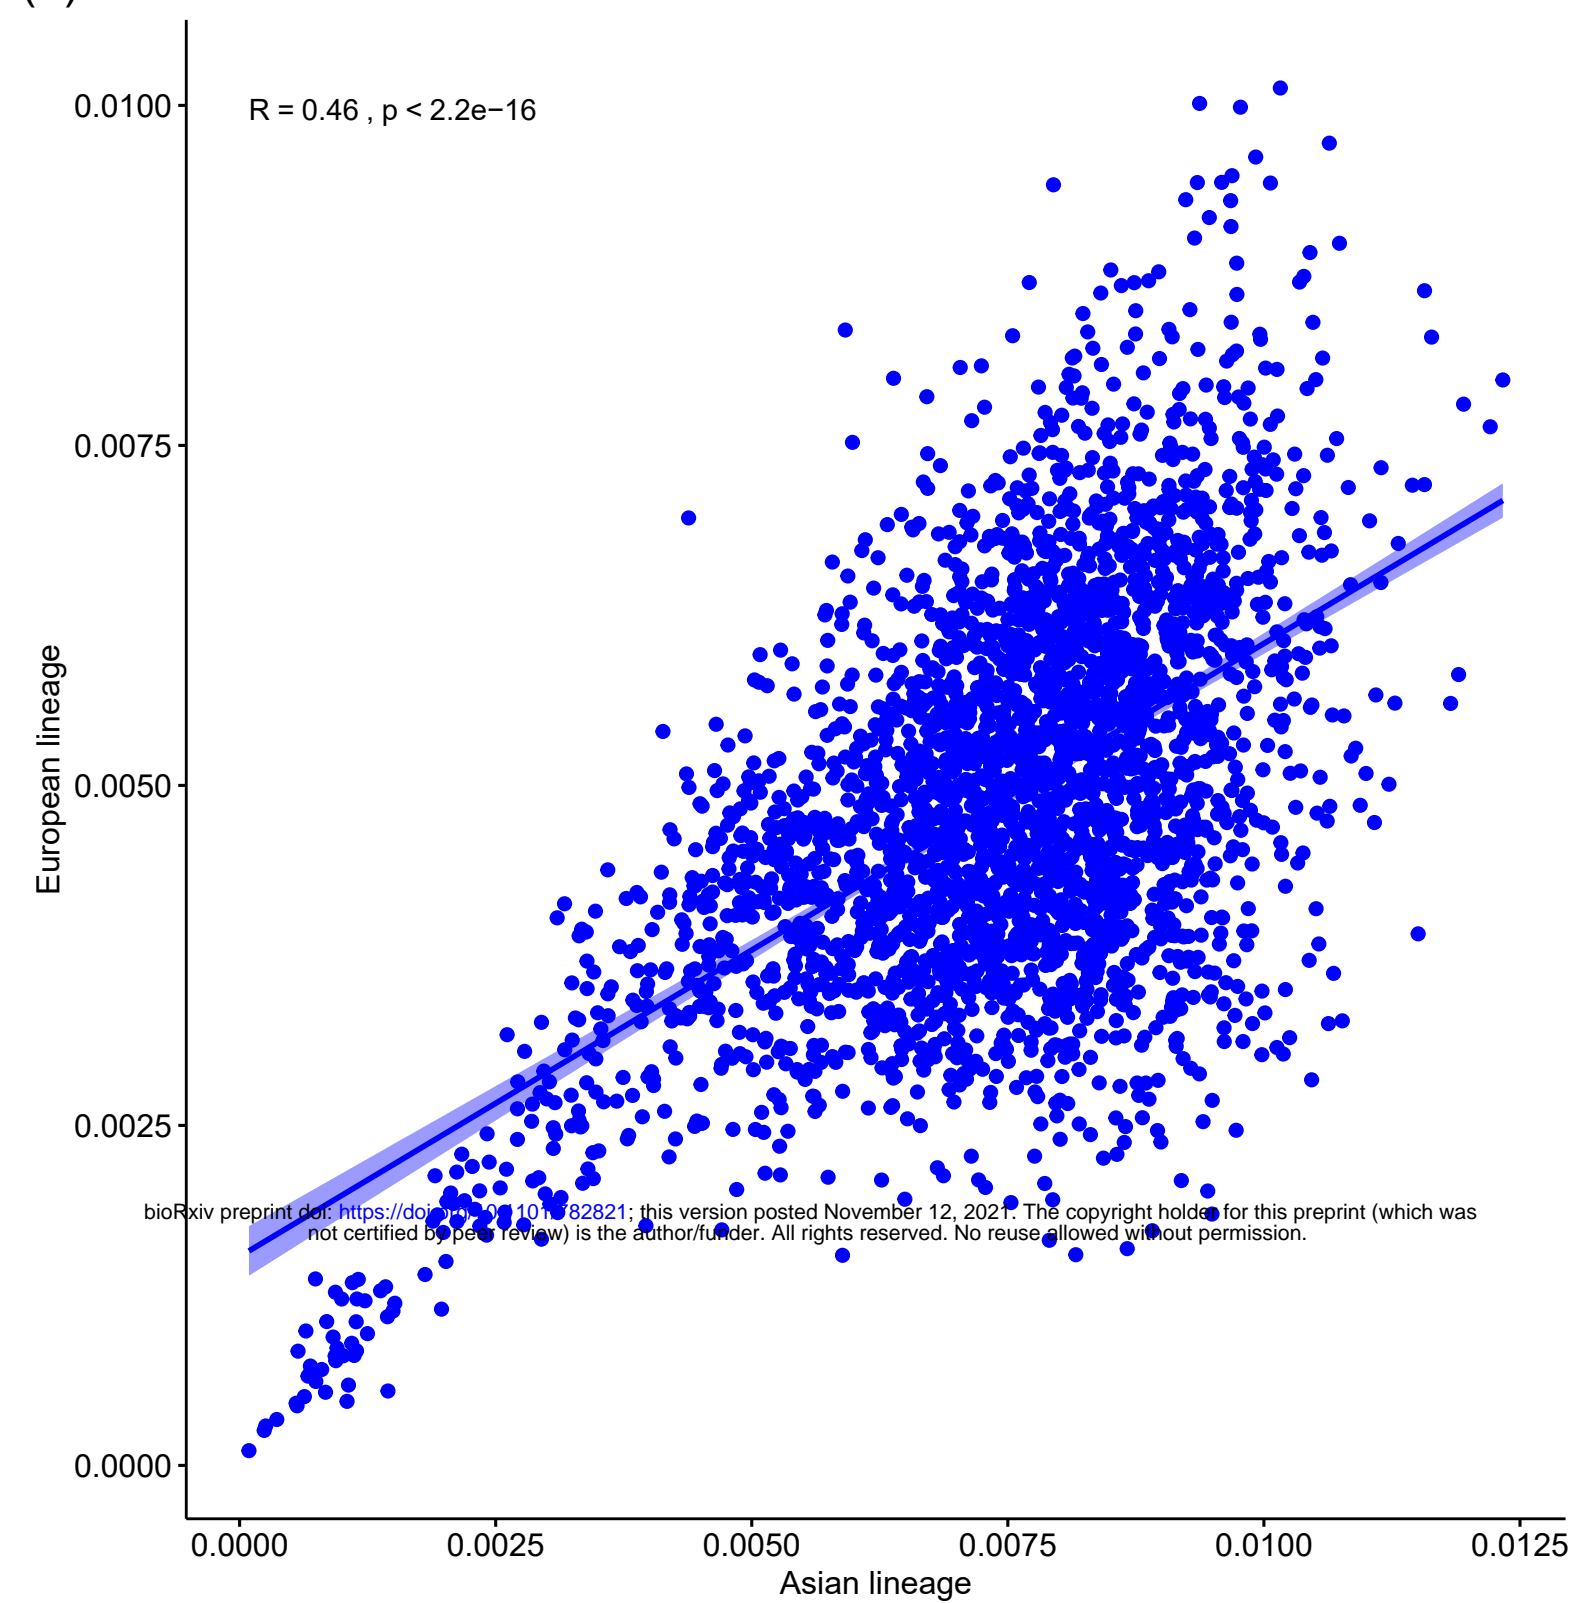

(b)

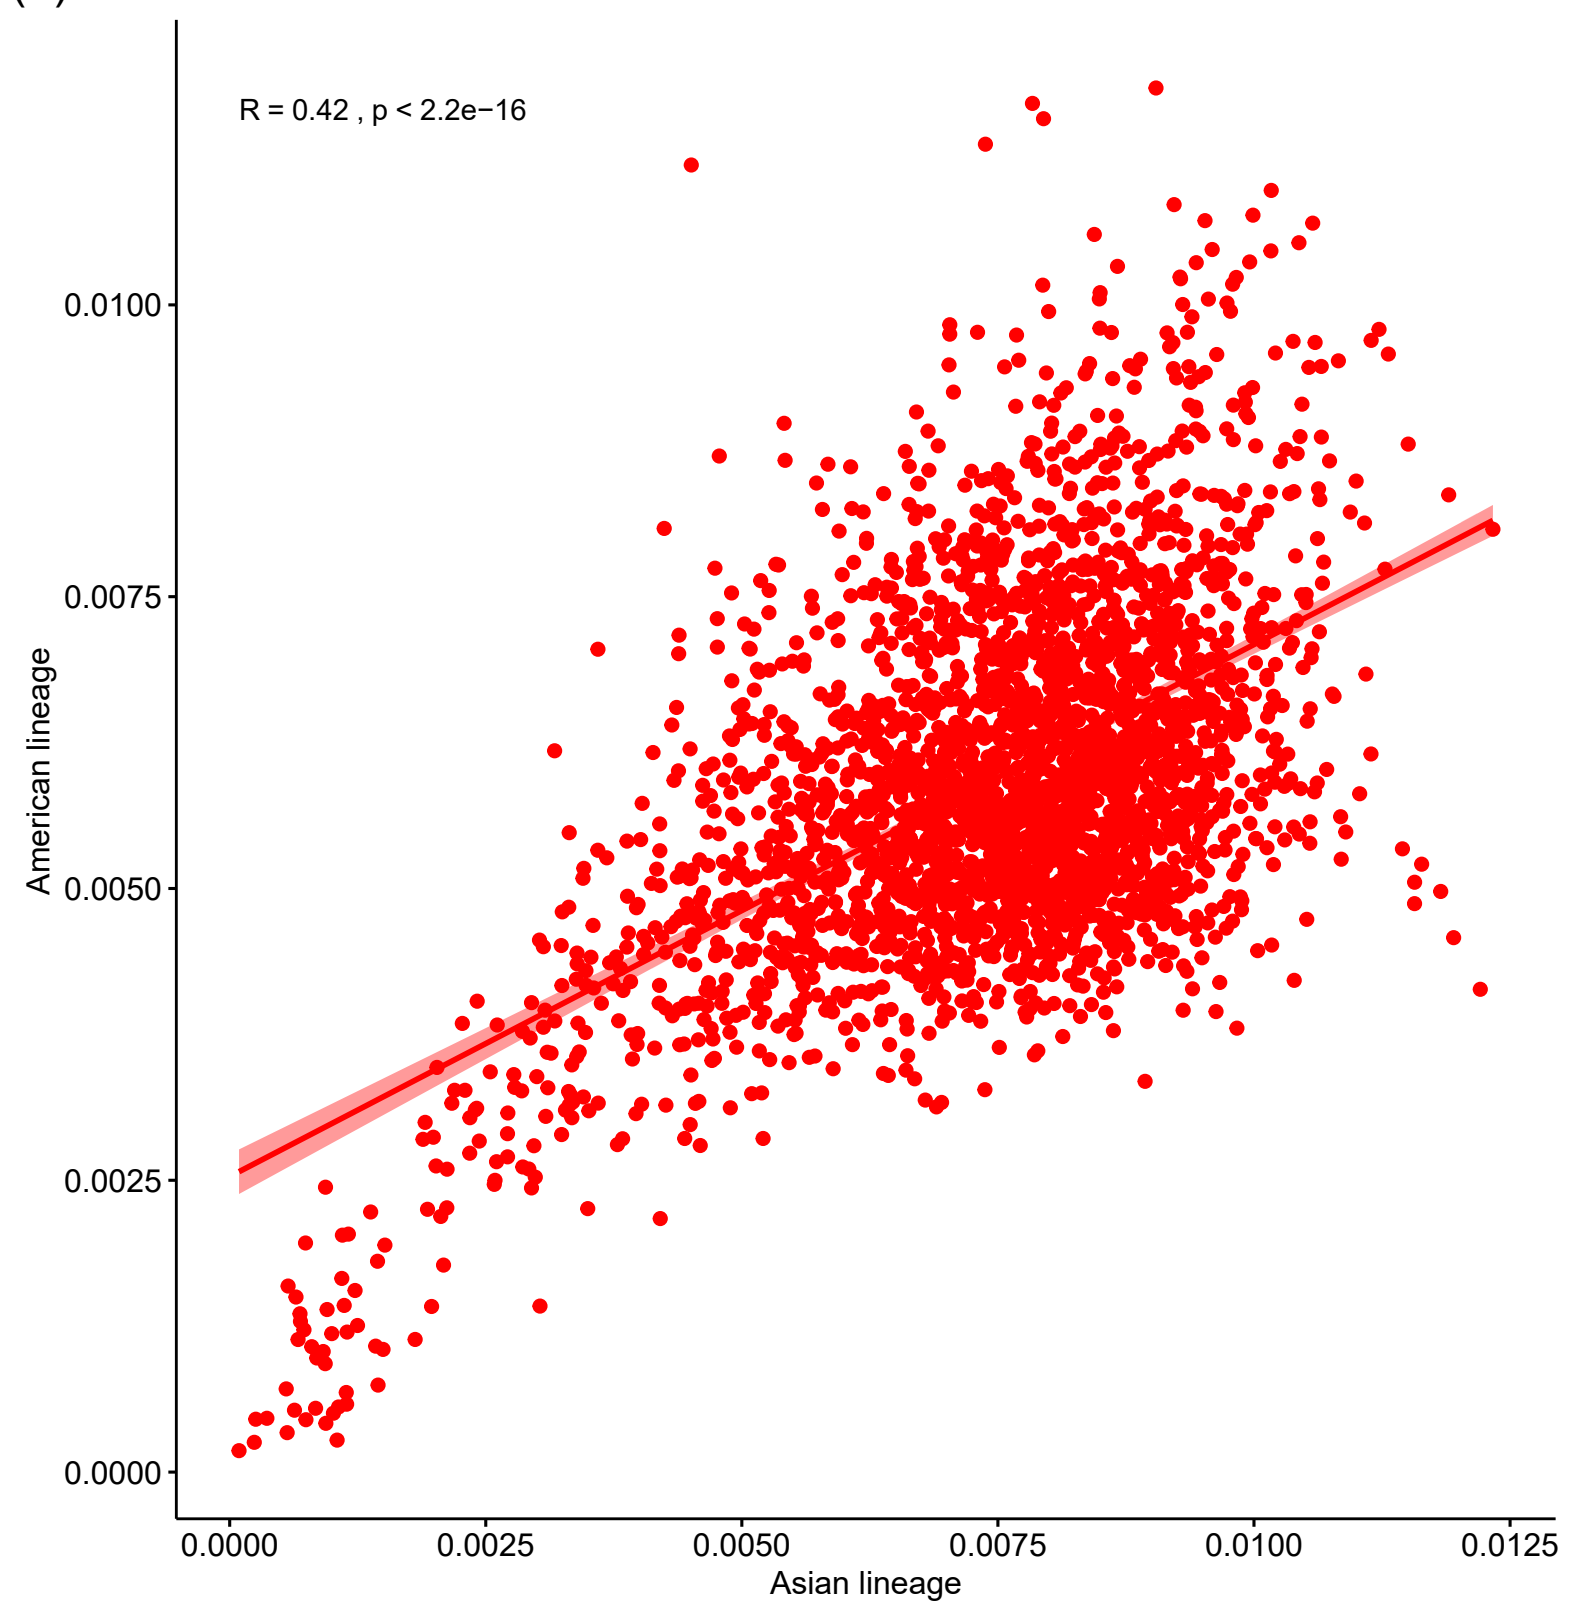

(c)

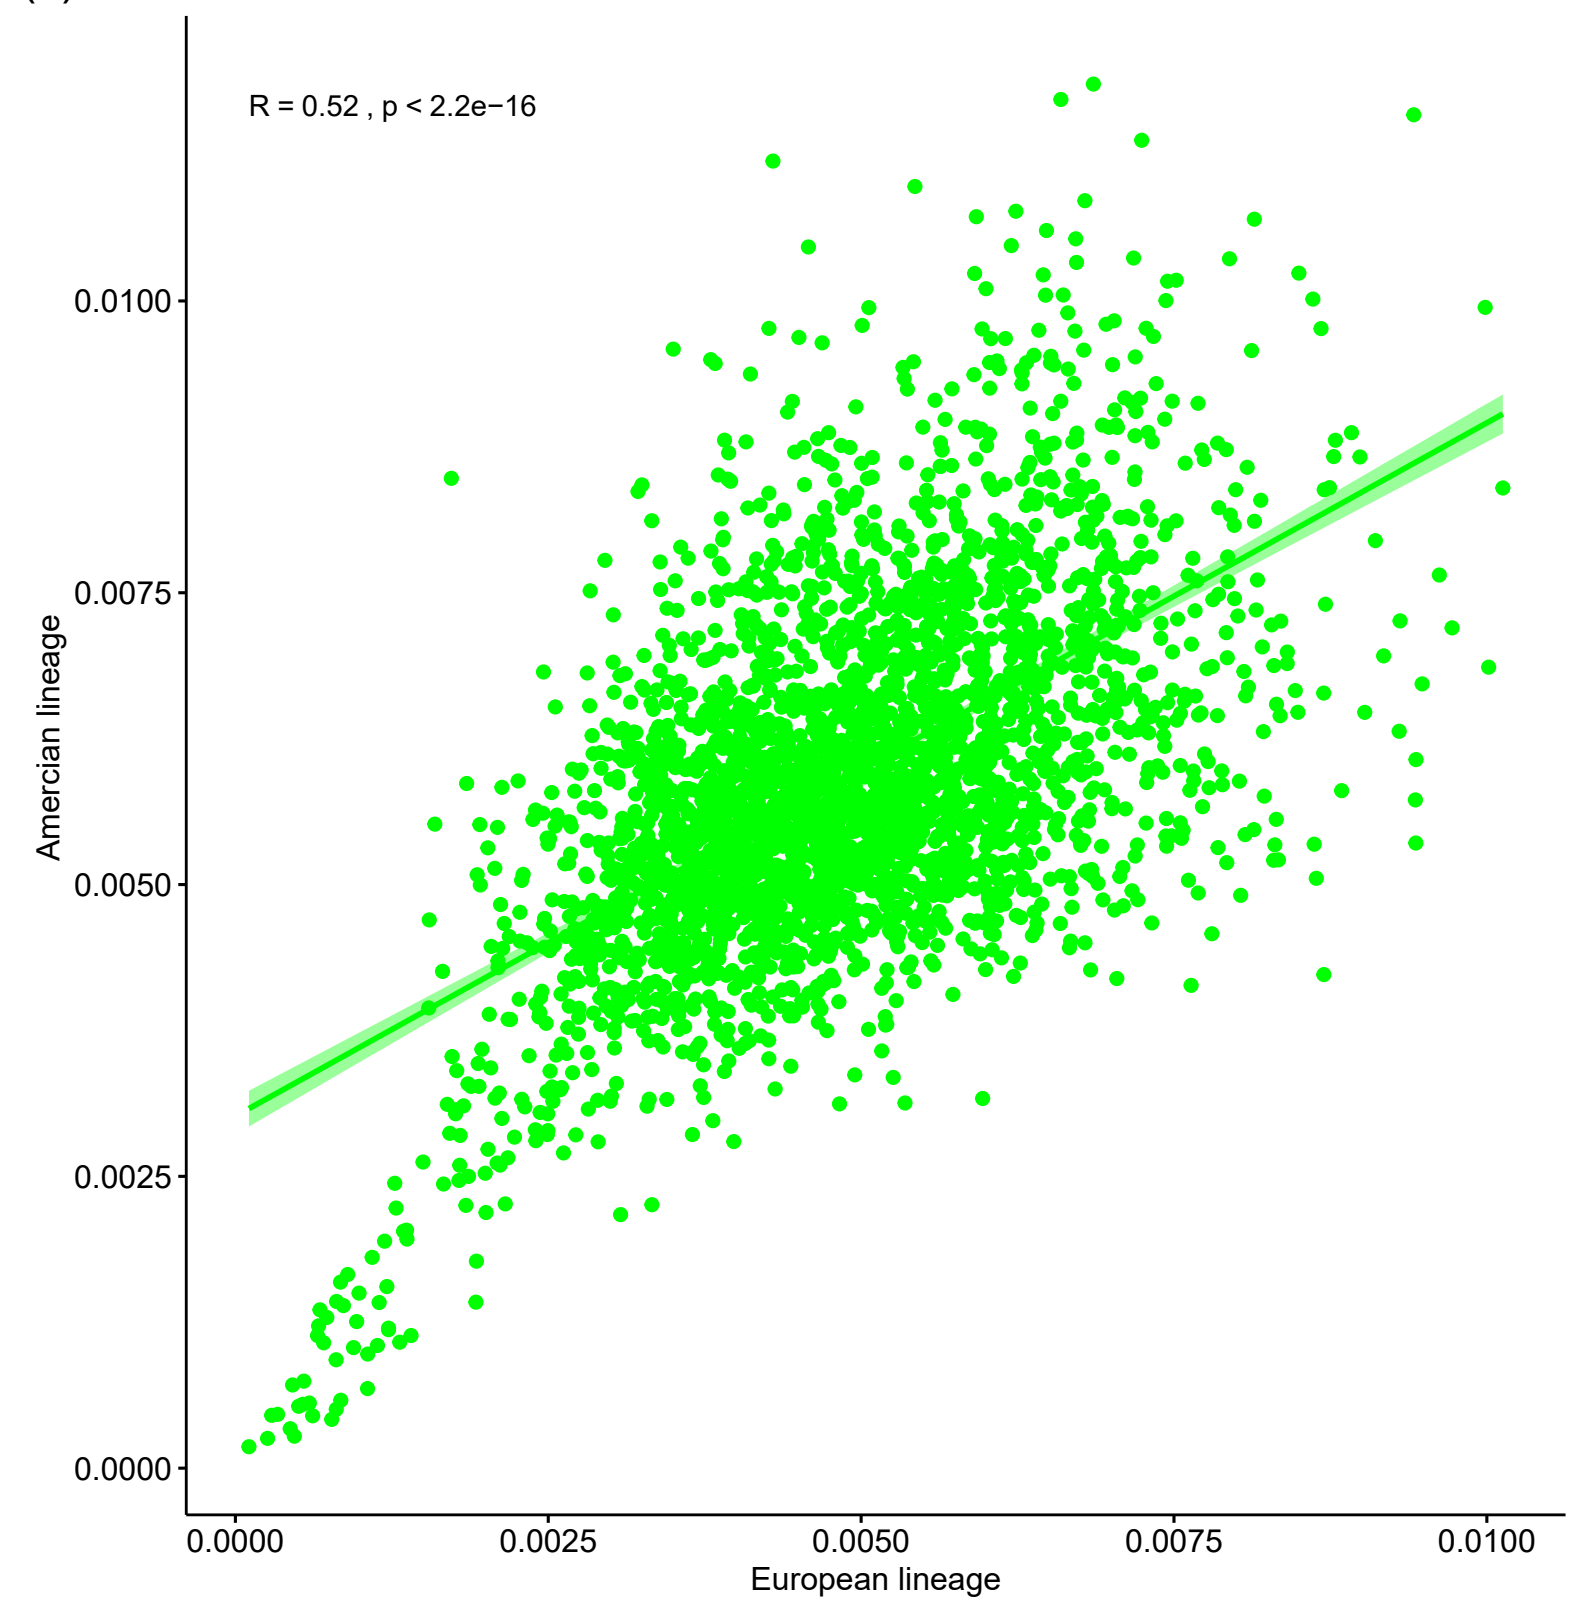

(d)

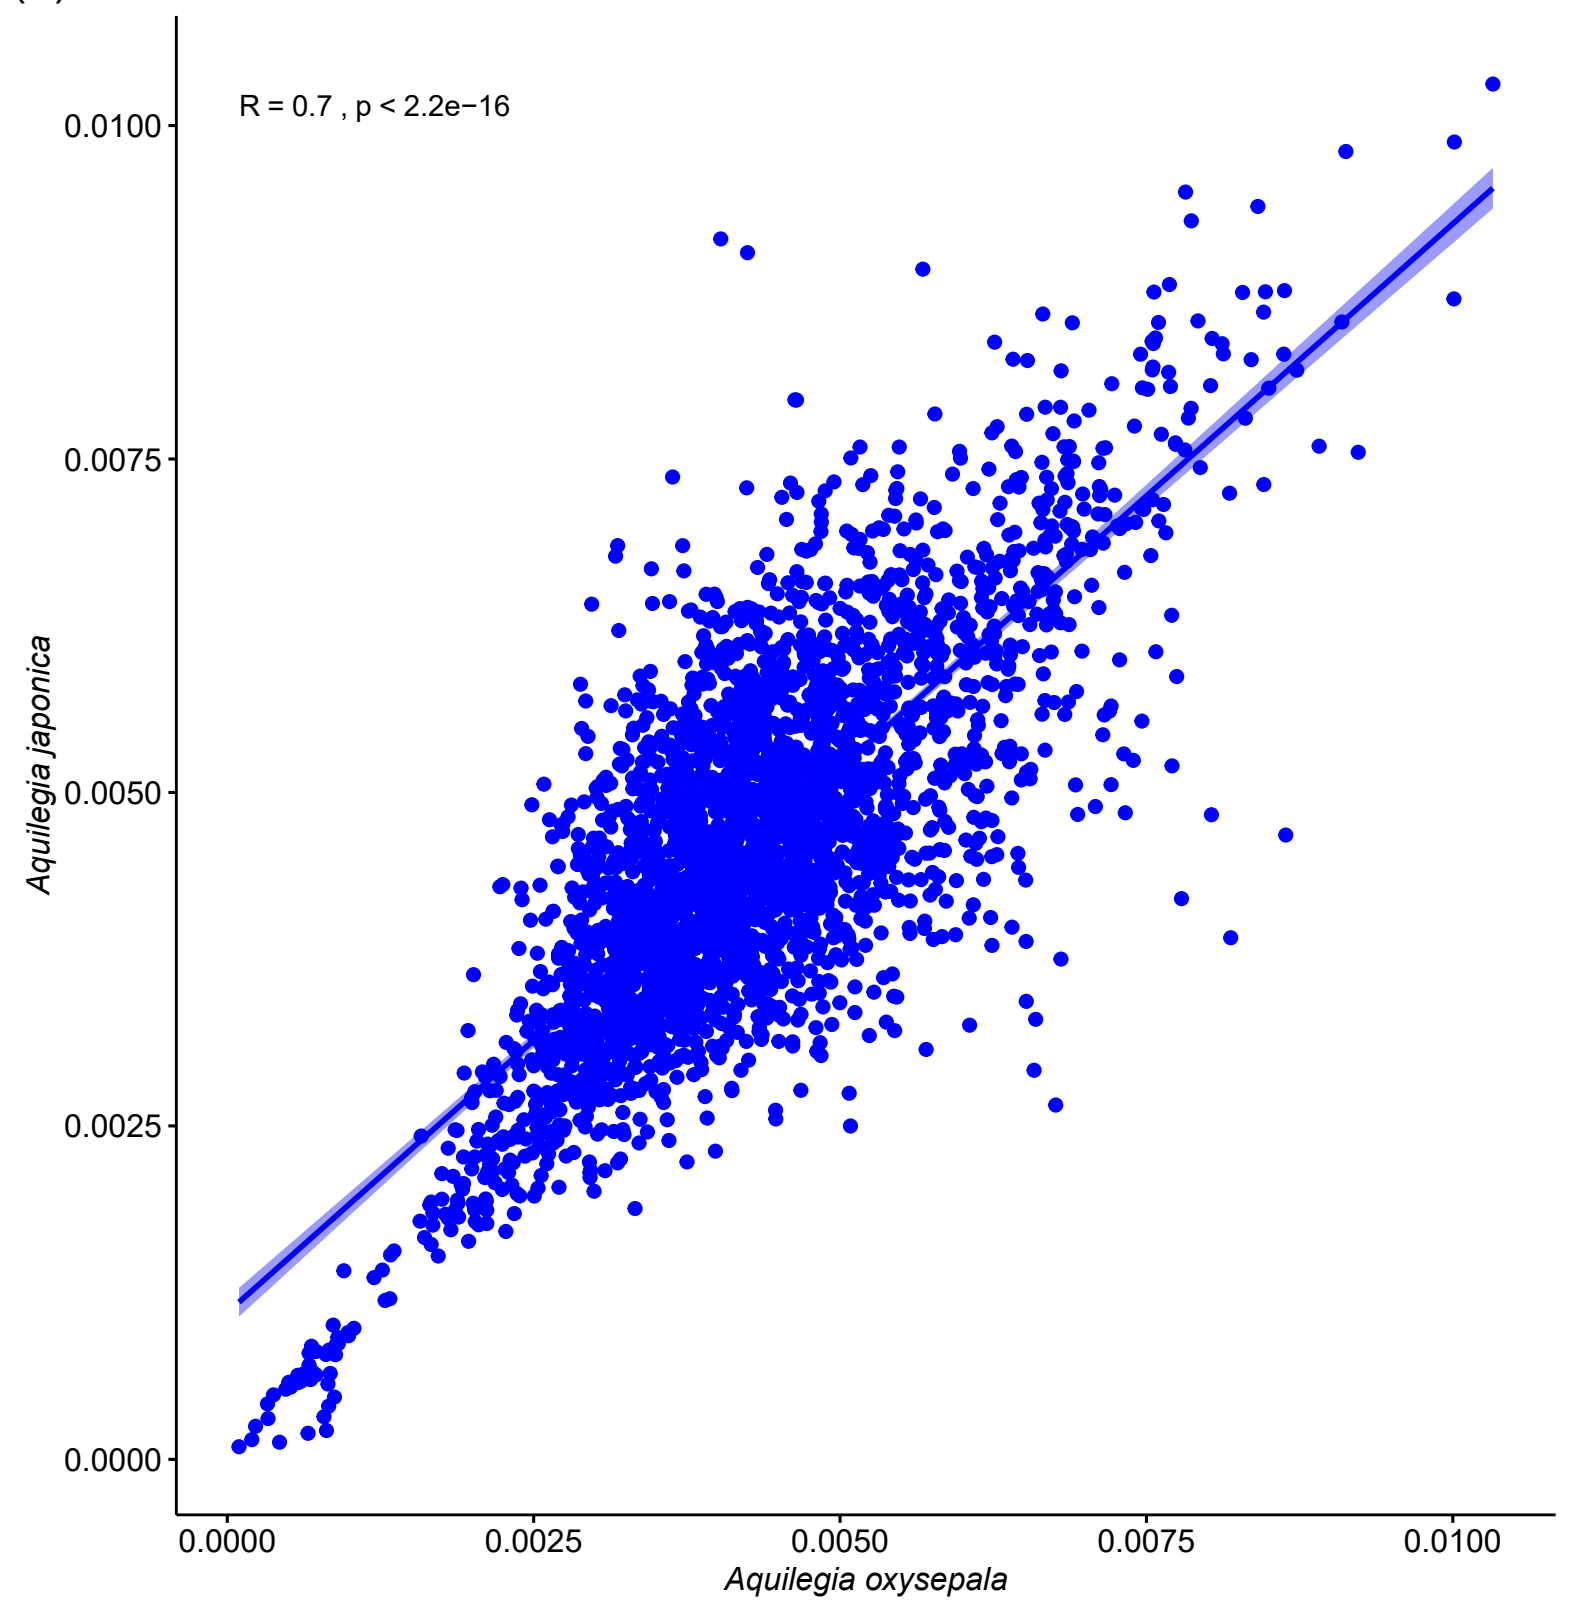



European

Asian

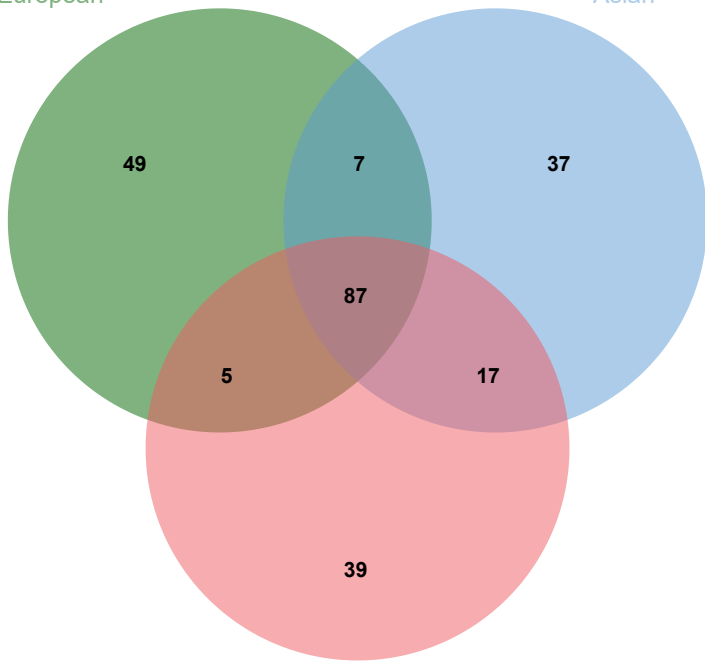

American

Size of each list

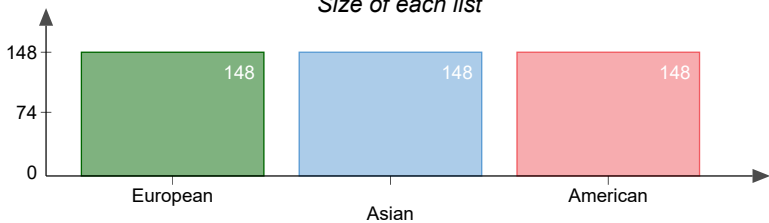

Number of elements: specific (1) or shared by 2, 3, ... lists

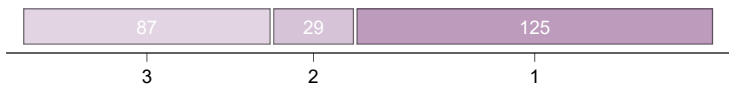

▢ American   
 ▢ European   
 ▢ Asian   
 ▢ Asian vs. American   
 ▢ American vs. European   
 ▢ Asian vs. European

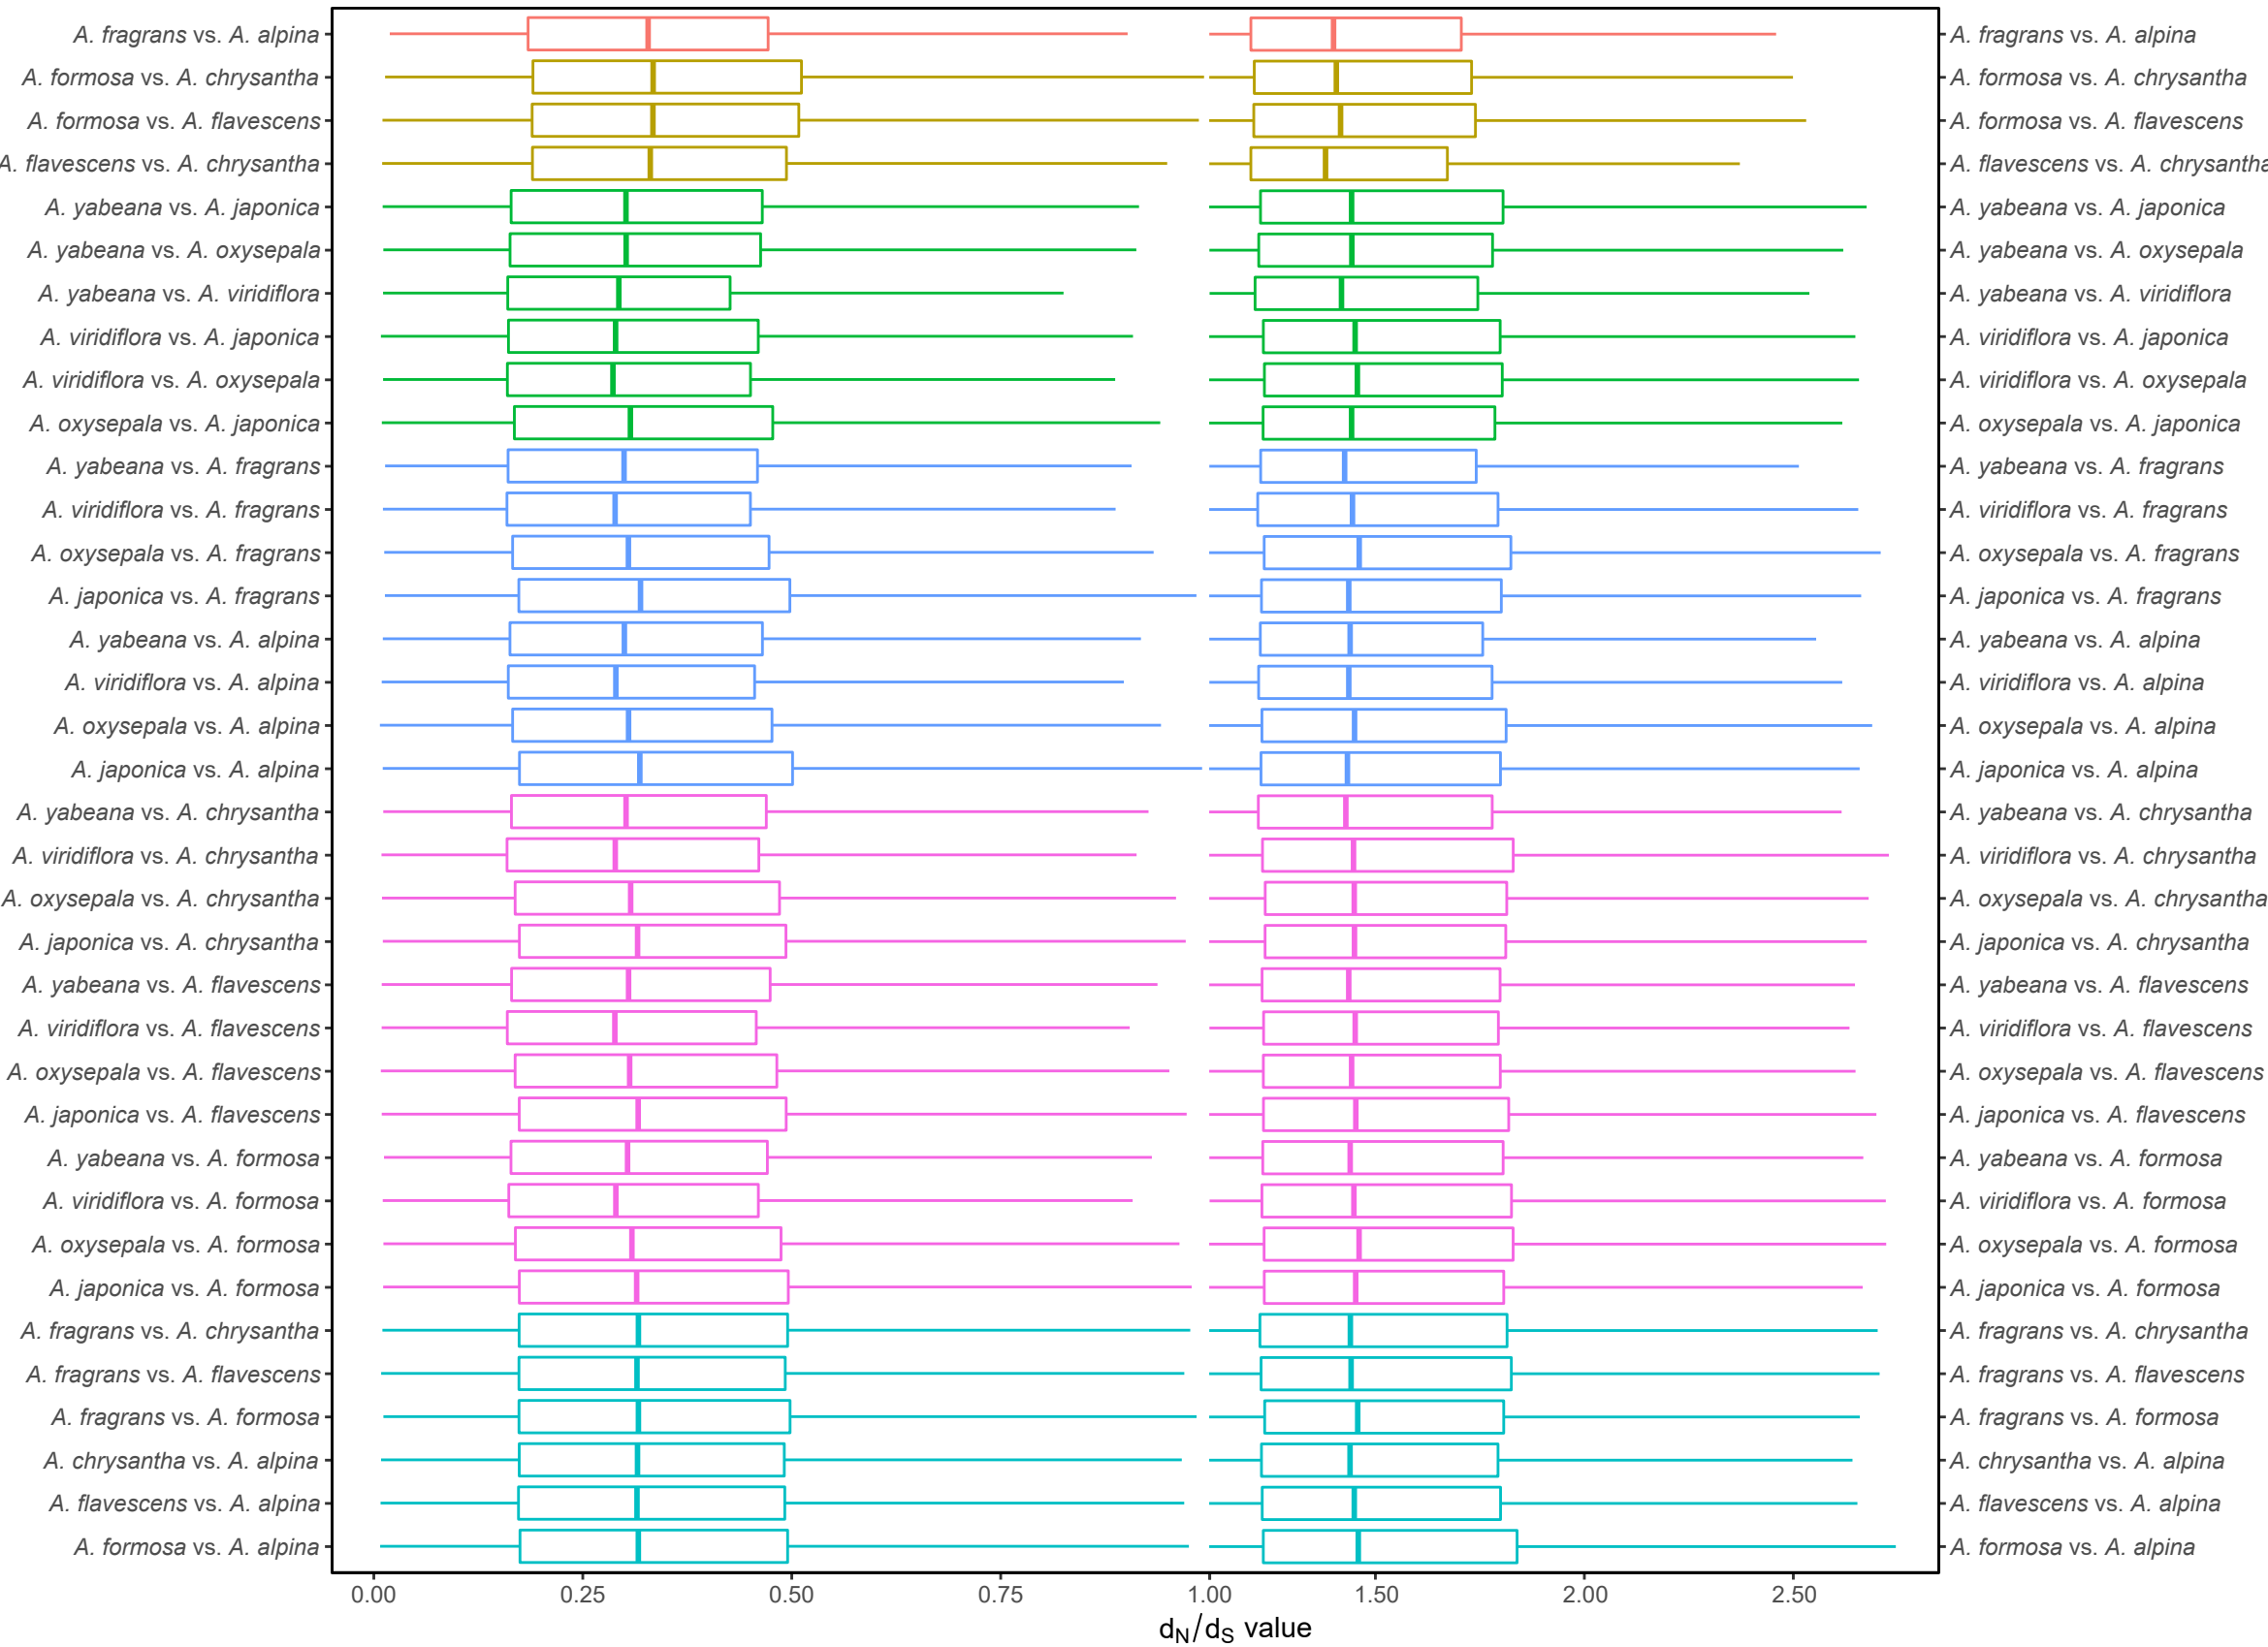

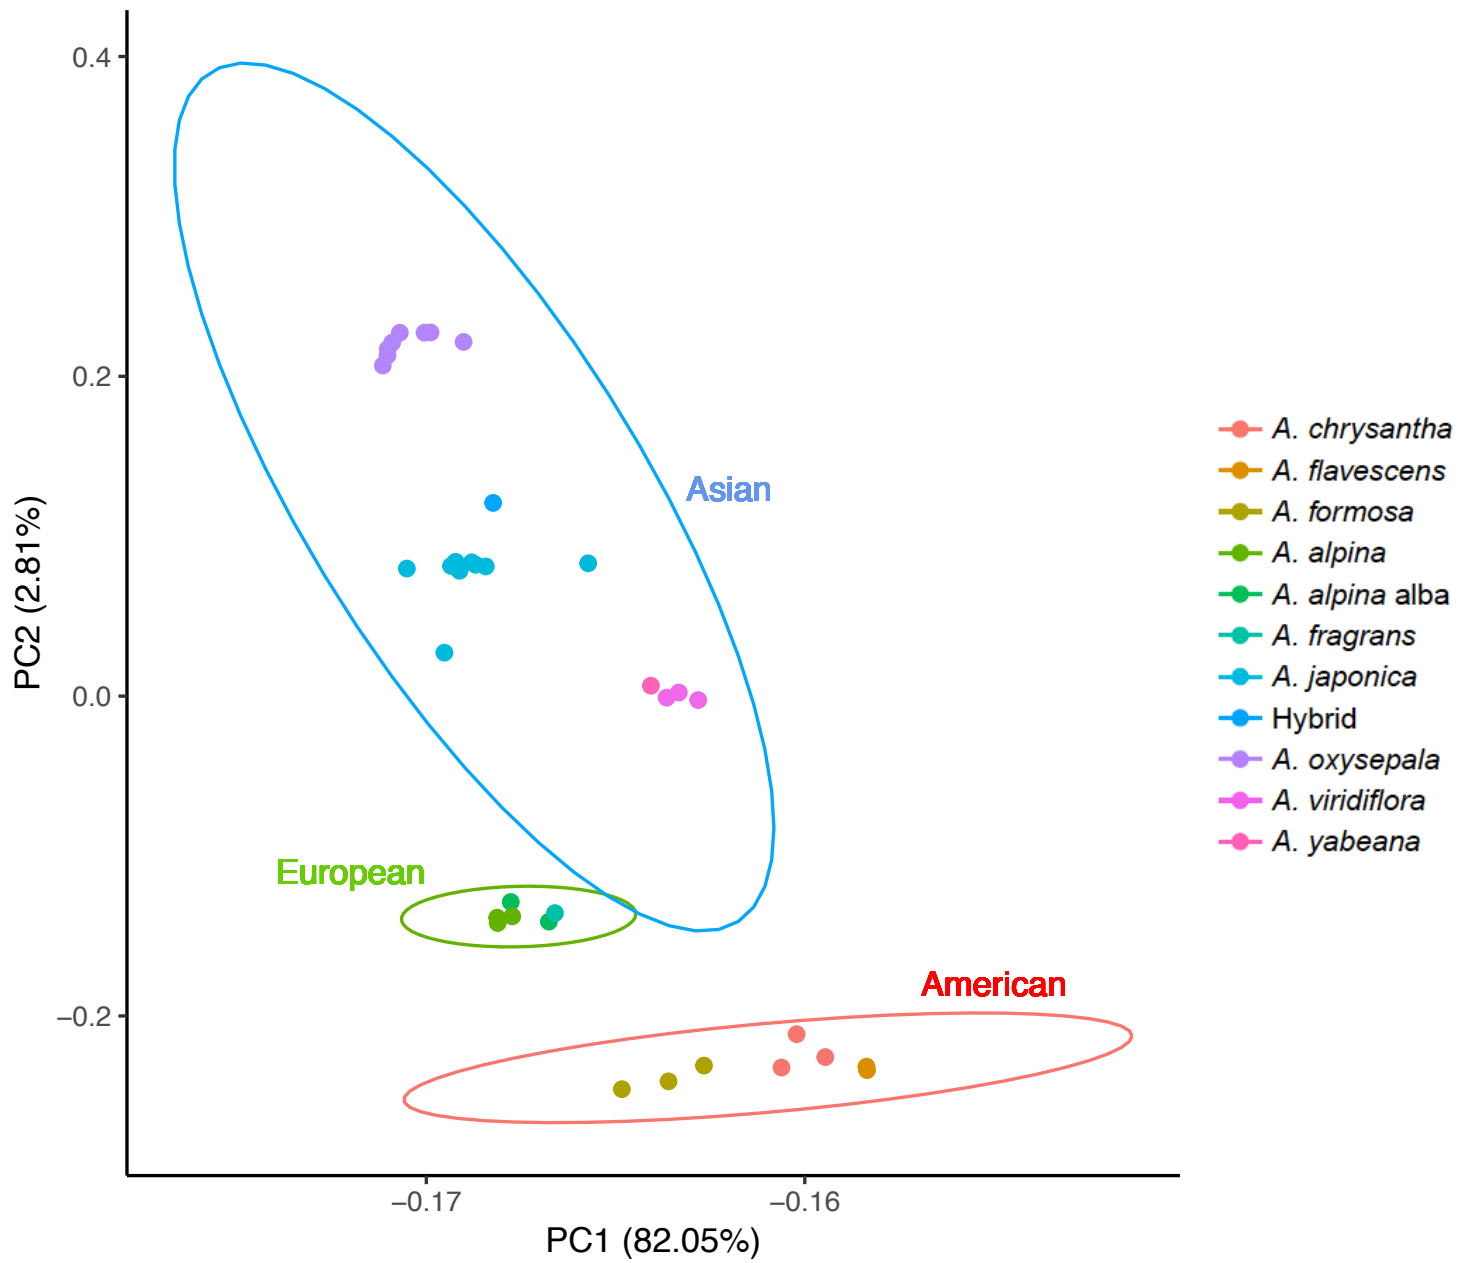

(a)

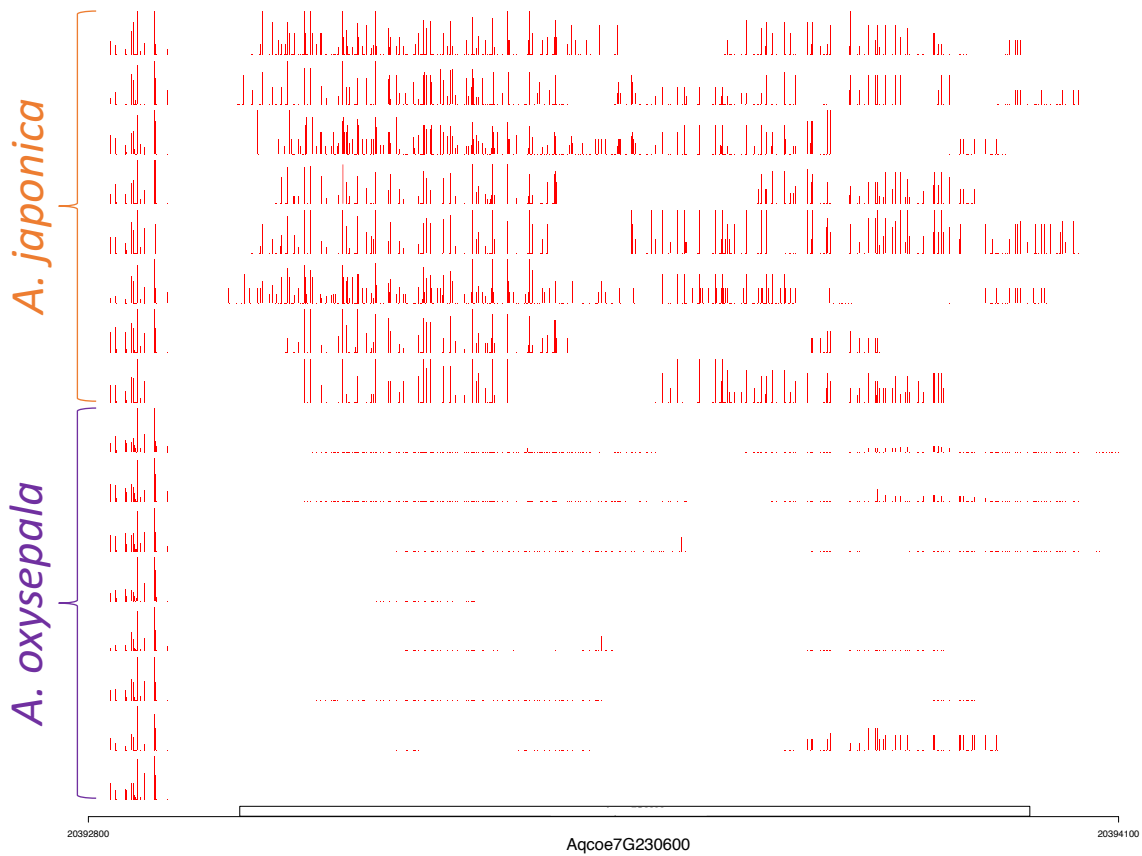

(b)

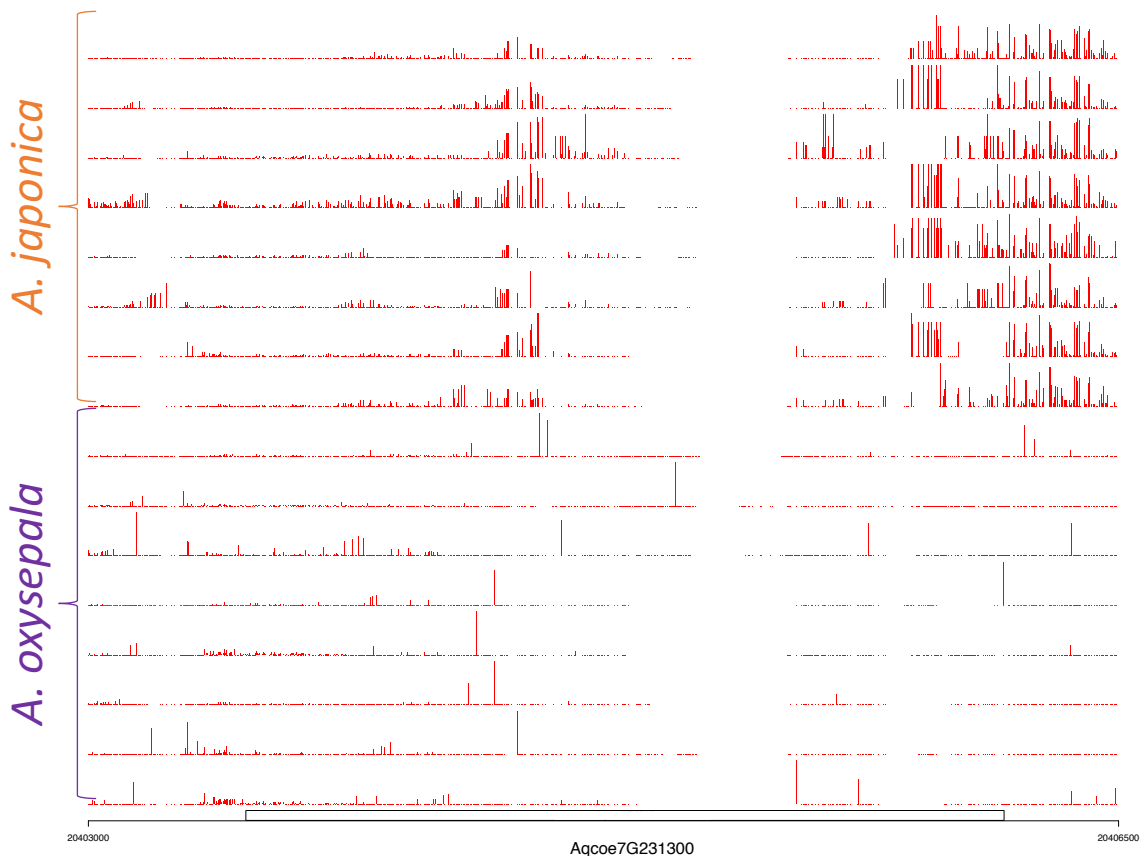

**(a)**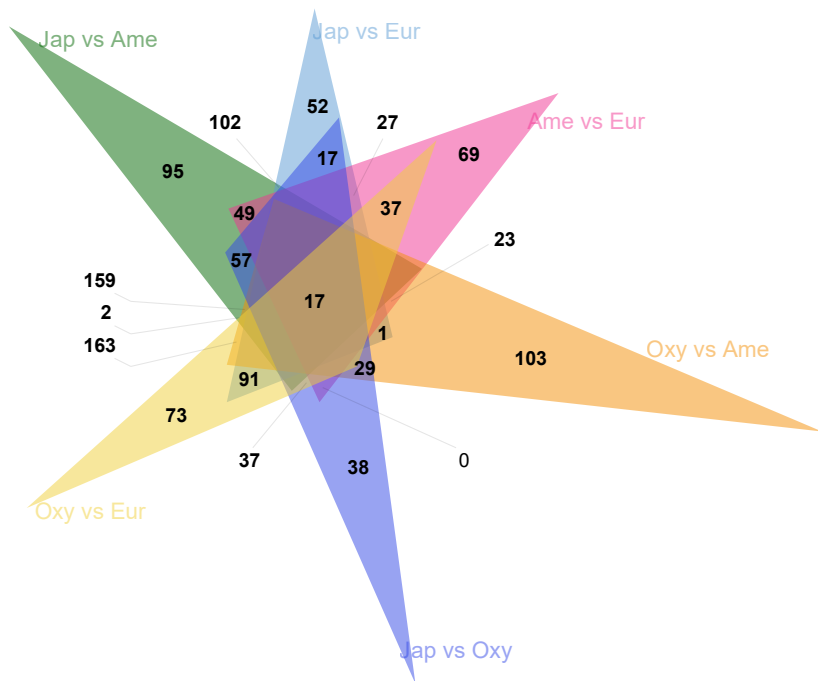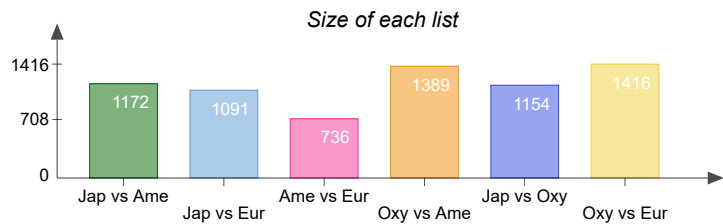

**Number of elements: specific (1) or shared by 2, 3, ... lists**

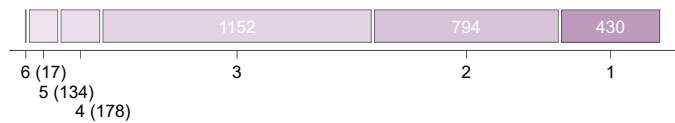**(b)**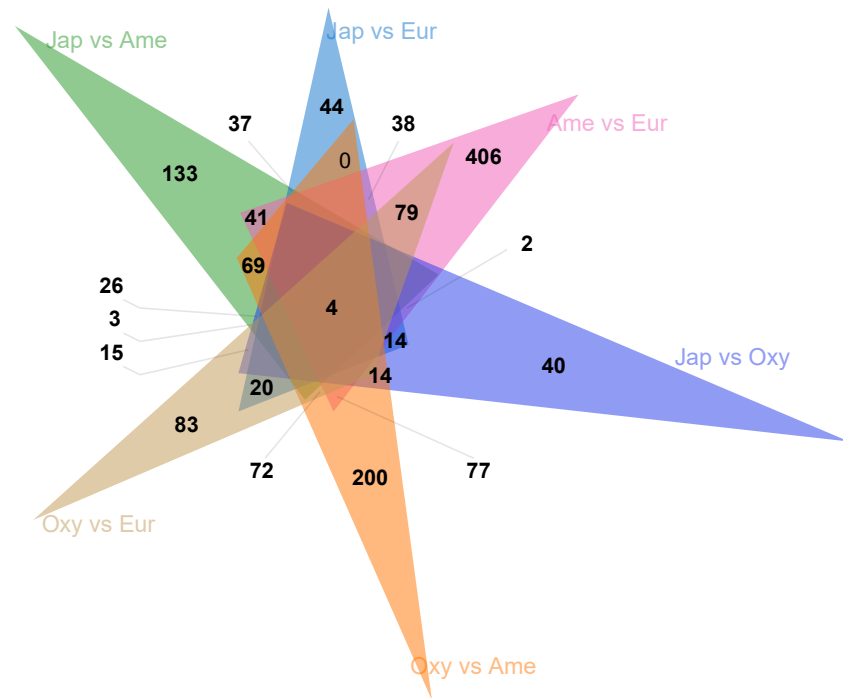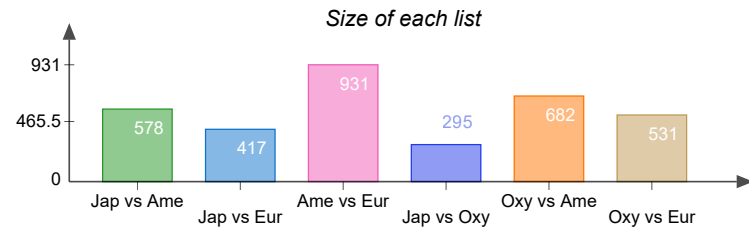

**Number of elements: specific (1) or shared by 2, 3, ... lists**

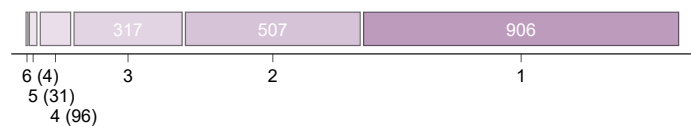

**(a)** *A. japonica* and *A. oxysepala*

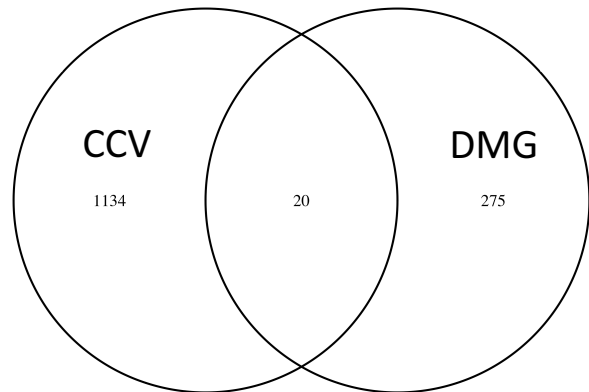

**(b)** *A. japonica* and North American

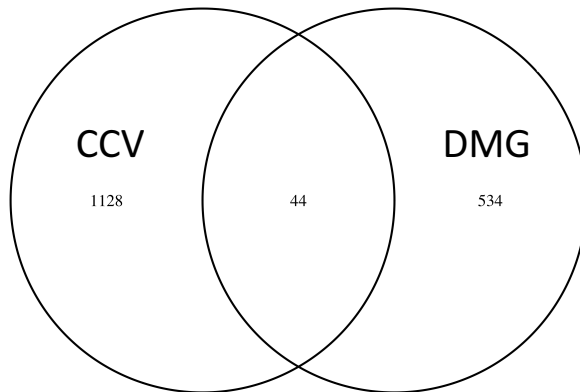

**(c)** *A. japonica* and European

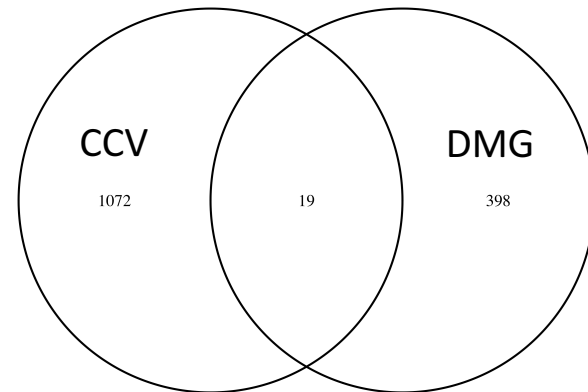

**(d)** *A. oxysepala* and North American

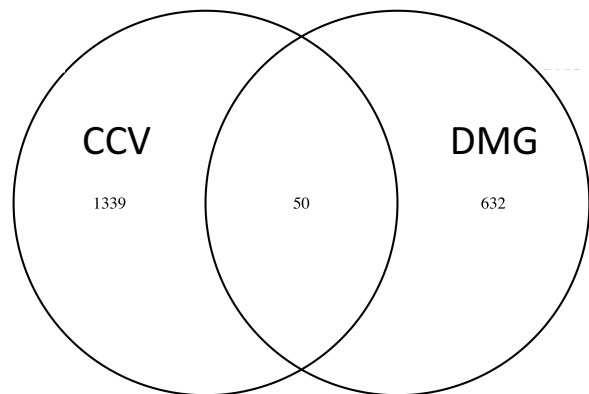

**(e)** *A. oxysepala* and European

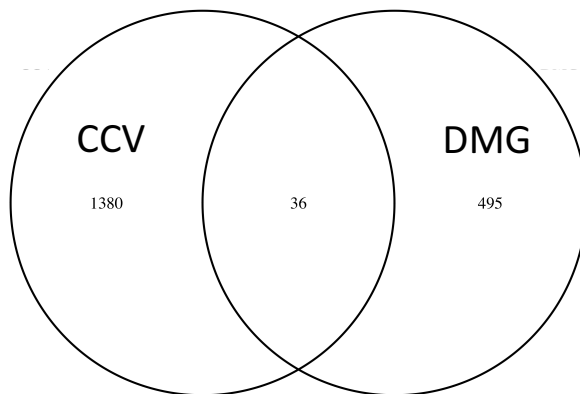

**(f)** North American and European

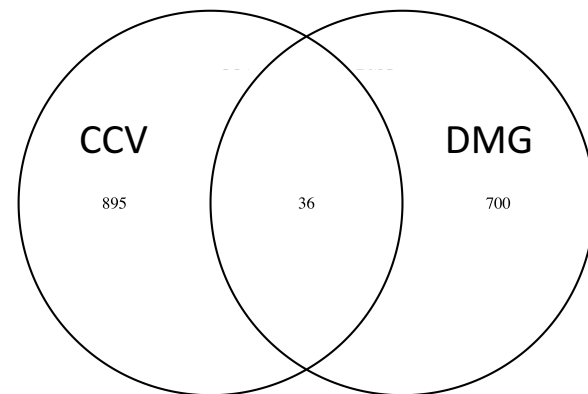

Source: https://www.biorxiv.org/content/biorxiv/early/2021/11/12/782821.full.pdf
